1 **Long-Term Follow-Up Defines the Population That Benefits from Early**  
2 **Interception in a High-Risk Smoldering Multiple Myeloma Clinical Trial Using the**  
3 **Combination of Ixazomib, Lenalidomide, and Dexamethasone.**

4  
5 Running/Short title: Ixazomib, Lenalidomide, Dexamethasone in HR-SMM  
6

7  
8 Authors: Omar Nadeem<sup>1\*</sup>, Michelle P. Aranha<sup>1,4\*</sup>, Robert Redd<sup>2</sup>, Michael Timonian<sup>1,4</sup>,  
9 Sophie Magidson<sup>1</sup>, Elizabeth D. Lightbody<sup>1,4</sup>, Jean-Baptiste Alberge<sup>1,4</sup>, Luca Bertamini<sup>1</sup>,  
10 Ankit K. Dutta<sup>1</sup>, Habib El-Khoury<sup>1</sup>, Mark Bustoros<sup>1,3</sup>, Jacob P. Laubach<sup>1</sup>, Giada Bianchi<sup>1</sup>,  
11 Elizabeth O'Donnell<sup>1</sup>, Ting Wu<sup>4</sup>, Junko Tsuji<sup>4</sup>, Kenneth Anderson<sup>1</sup>, Gad Getz<sup>4</sup>, Lorenzo  
12 Trippa<sup>2</sup>, Paul G. Richardson<sup>1</sup>, Romanos Sklavenitis-Pistofidis<sup>1,4</sup>, and Irene M. Ghobrial<sup>1</sup>  
13

14 <sup>1</sup>Center for Early Detection and Interception of Blood Cancers, Department of Medical  
15 Oncology, Dana-Farber Cancer Institute, Boston, MA, USA

16 <sup>2</sup>Department of Biostatistics and Computational Biology, Dana-Farber Cancer Institute,  
17 Boston, MA, USA

18 <sup>3</sup>Division of Hematology and Medical Oncology, Meyer Cancer Center, New York-  
19 Presbyterian Hospital, New York, New York, USA

20 <sup>4</sup>Broad Institute, Boston, MA, USA  
21

22 \*Co-first author  
23

24 Corresponding Authors:

25 Irene Ghobrial, MD  
26 Dana-Farber Cancer Institute  
27 450 Brookline Ave,  
28 Boston, MA  
29 irene\_ghobrial@dfci.harvard.edu\_  
30 Phone: 617-632-4198  
31

Omar Nadeem, MD  
Dana-Farber Cancer Institute  
450 Brookline Ave,  
Boston, MA  
omar\_nadeem@dfci.harvard.edu  
Phone: 617-632-4952

32 **Abstract**

33 **Background:** Early therapeutic intervention in high-risk SMM (HR-SMM) has  
34 demonstrated benefit in previous studies of lenalidomide with or without dexamethasone.  
35 Triplets and quadruplet studies have been examined in this same population. However,  
36 to date, none of these studies examined the impact of depth of response on long-term  
37 outcomes of participants treated with lenalidomide-based therapy, and whether the use  
38 of the 20/2/20 model or the addition of genomic alterations can further define the  
39 population that would benefit the most from early therapeutic intervention. Here, we  
40 present the results of the phase II study of the combination of ixazomib, lenalidomide,  
41 and dexamethasone in patients with HR-SMM with long-term follow-up and baseline  
42 single-cell tumor and immune sequencing that help refine the population to be treated for  
43 early intervention studies.

44 **Methods:** This is a phase II trial of ixazomib, lenalidomide, and dexamethasone (IRD) in  
45 HR-SMM. Patients received 9 cycles of induction therapy with ixazomib 4mg on days 1,  
46 8, and 15; lenalidomide 25mg on days 1-21; and dexamethasone 40mg on days 1, 8, 15,  
47 and 22. The induction phase was followed by maintenance with ixazomib 4mg on days 1,  
48 8, and 15; and lenalidomide 15mg d1-21 for 15 cycles for 24 months of treatment. The  
49 primary endpoint was progression-free survival after 2 years of therapy. Secondary  
50 endpoints included depth of response, biochemical progression, and correlative studies  
51 included single-cell RNA sequencing and/or whole-genome sequencing of the tumor and  
52 single-cell sequencing of immune cells at baseline.

53 **Results:** Fifty-five patients, with a median age of 64, were enrolled in the study. The  
54 overall response rate was 93%, with 31% of patients achieving a complete response and  
55 45% achieving a very good partial response or better. The most common grade 3 or  
56 greater treatment-related hematologic toxicities were neutropenia (16 patients; 29%),  
57 leukopenia (10 patients; 18%), lymphocytopenia (8 patients; 15%), and thrombocytopenia  
58 (4 patients; 7%). Non-hematologic grade 3 or greater toxicities included  
59 hypophosphatemia (7 patients; 13%), rash (5 patients; 9%), and hypokalemia (4 patients;  
60 7%). After a median follow-up of 50 months, the median progression-free survival (PFS)  
61 was 48.6 months (95% CI: 39.9 – not reached; NR) and median overall survival has not  
62 been reached. Patients achieving VGPR or better had a significantly better progression-  
63 free survival ( $p < 0.001$ ) compared to those who did not achieve VGPR (median PFS 58.2  
64 months vs. 31.3 months). Biochemical progression preceded or was concurrent with the  
65 development of SLiM-CRAB criteria in eight patients during follow-up, indicating that  
66 biochemical progression is a meaningful endpoint that correlates with the development of  
67 end-organ damage. High-risk 20/2/20 participants had the worst PFS compared to low-  
68 and intermediate-risk participants. The use of whole genome or single-cell sequencing of  
69 tumor cells identified high-risk aberrations that were not identified by FISH alone and  
70 aided in the identification of participants at risk of progression. scRNA-seq analysis  
71 revealed a positive correlation between MHC class I expression and response to  
72 proteasome inhibition and at the same time a decreased proportion of GZMB+ T cells  
73 within the clonally expanded CD8+ T cell population correlated with suboptimal response.

74 **Conclusions:** Ixazomib, lenalidomide and dexamethasone in HR-SMM demonstrates  
75 significant clinical activity with an overall favorable safety profile. Achievement of VGPR  
76 or greater led to significant improvement in time to progression, suggesting that achieving  
77 deep response is beneficial in HR-SMM. Biochemical progression correlates with end-  
78 organ damage. Patients with high-risk FISH and lack of deep response had poor  
79 outcomes. ClinicalTrials.gov identifier: (NCT02916771)

80

81 Funding: Takeda and Celgene (Bristol Myers Squibb) provided support for the clinical  
82 trial. These funders reviewed the final manuscript and approved its publication; they were  
83 not involved in the conceptualization, design, data collection, analysis, or preparation of  
84 the manuscript. Funding was also provided by the Dr. Miriam and Sheldon G. Adelson  
85 Medical Research Foundation and the NIH (R35CA263817 awarded to I.M.G.).

86

## 87 Introduction

88

89 Smoldering multiple myeloma (SMM), defined by the presence of  $\geq 10\%$  clonal plasma  
90 cells in the bone marrow and/or  $\geq 3\text{g/dl}$  monoclonal (M) protein in the serum without the  
91 presence of any myeloma-defining events (MDE), carries a heterogeneous risk of  
92 progression to overt multiple myeloma (MM), with an average risk of  $10\%$  per year for the  
93 first 5 years after diagnosis and then approximately  $1\text{-}2\%$  per year thereafter<sup>1</sup>. There is a  
94 subset of patients that are considered high-risk SMM (HR-SMM) and multiple efforts have  
95 been undertaken to further define this high-risk group, which carries an approximately  
96  $50\%$  risk of progression to overt MM at 2 years. The Mayo 2008 criteria defined HR-SMM  
97 as having  $\geq 10\%$  plasmacytosis, M protein  $\geq 3\text{ g/dl}$ , and an SFLC ratio  $\geq 8$  or  $\leq 0.125$ <sup>2</sup>.  
98 Many additional risk models have been studied including the PETHEMA criteria, evolving  
99 criteria, and IgA subtype, all of which were also shown to have prognostic relevance<sup>3</sup>. A  
100 study by Rajkumar et al. compiled all the high-risk features of SMM to help define this  
101 population<sup>4</sup>. Later, the IMWG/Mayo 2018 criteria were revised and defined high risk as  
102 having the presence of at least 2 of the following 3 criteria: bone marrow plasmacytosis  
103  $>20\%$ , M protein  $>2\text{ g/dl}$ , and an SFLC ratio  $>20$ <sup>5,6</sup>. While these models help identify  
104 patients at high risk of progression, they mostly leverage clinical variables and can give  
105 discordant results for an individual<sup>7</sup>. Prediction models that take into account disease  
106 biology may be able to overcome some of these challenges. In recent years for example,  
107 *MYC* translocations and copy number abnormalities, *KRAS* mutations, Del17p and *TP53*  
108 mutations, as well as APOBEC activity and chromothripsis have been shown to portend  
109 a higher risk of progression<sup>8-12</sup>.

110

111 Management of SMM has historically consisted of observation. However, with advances  
112 in risk stratification methods and MM therapy, early therapeutic intervention may offer an  
113 improved prognosis without morbidity from MM for high-risk patients. There have been 2  
114 phase III trials utilizing lenalidomide or lenalidomide and dexamethasone in patients with  
115 HR-SMM. Both studies demonstrated improvement in progression-free survival (PFS),  
116 and one also demonstrated improvement in overall survival, further arguing for early  
117 intervention<sup>13,14</sup>. While the prolongation of overall survival with early intervention is a  
118 subject of debate, prolonging progression-free survival may delay end-organ damage  
119 which can be irreversible and can severely impact a patient's quality of life<sup>15-17</sup>.

120

121 Following these two randomized studies, multiple phase II studies using triplet or more  
122 recently quadruplet therapy have been initiated in high-risk SMM<sup>18-21</sup>. However, there are  
123 many unresolved questions about the optimal management of patients with HR-SMM,  
124 particularly regarding the use of response assessment metrics that were originally  
125 developed in patients with overt MM, such as depth of response and biochemical  
126 progression, as well as determining the group of patients who may benefit the most from  
127 early intervention. The studies using lenalidomide with or without dexamethasone had  
128 low rates of complete response and therefore could not assess the role of depth of  
129 response in long-term follow-up. Additionally, more recent studies using quadruplet  
130 therapy do not have enough long-term follow-up to assess this question yet. Here, we  
131 used the combination of ixazomib, lenalidomide, and dexamethasone in high-risk SMM.  
132 We aimed to help address several critical questions for therapeutic intervention in HR-

133 SMM: 1) whether depth of response (VGPR or CR) matters in the long-term outcome of  
134 patients treated with a lenalidomide-based therapy, 2) whether biochemical progression  
135 correlates with end-organ damage, 3) whether 20/2/20 defines participants who would  
136 benefit the most from early intervention with lenalidomide-based therapy, and 4) whether  
137 the addition of genomic biomarkers can improve the risk stratification of these participants  
138 enrolled on these studies.

139

140

## 141 **Results**

142

### 143 Baseline characteristics.

144

145 Between March 2017 and February 2020, 55 patients were enrolled on this study (**Figure**  
146 **1A**). Patient baseline characteristics, definition of high-risk SMM, and high-risk  
147 cytogenetics are summarized in **Table 1A**. The median age was 64 (range 40-84) with  
148 30 (55%) males and 25 (45%) females. All patients had an Eastern Cooperative Oncology  
149 Group (ECOG) performance status of  $\leq 1$ . Patients were enrolled using the list of high-risk  
150 criteria compiled by Rajkumar et al<sup>4</sup>. For cross-study comparisons, we defined patients  
151 with high-risk disease based on several validated models in **Table 1B**, including the Mayo  
152 2008, Mayo 2018, IMWG risk score tool, and high-risk cytogenetics. High risk FISH was  
153 defined as follows: gain1q, del13q, del17p, del1p, t(4;14), t(14;16).

154

155 While FISH testing is a standard method to define risk in MM, the failure rate of FISH in  
156 this study was 36% (FISH at screening was successful in 35/55) (**Figure 1B**). Therefore,  
157 we employed whole genome sequencing (WGS) and single-cell RNA (scRNA)  
158 sequencing to identify high-risk translocations and copy number alterations (CNA). The  
159 translocations and copy number alterations identified by FISH, WGS, and scRNA-seq are  
160 displayed in **Figure 1B**. From scRNA-seq, we leveraged the expression level of primary  
161 IgH translocation marker genes to infer the presence of translocations and observed high  
162 concordance between the expression of said marker genes and FISH results, but  
163 additionally detected translocations in three patients in whom FISH had failed due to low  
164 cell numbers. Furthermore, using Numbat<sup>22</sup> to infer CNAs from scRNA-seq data, we  
165 detected hyperdiploidy (homologous recombination deficiency: HRD) in another four  
166 patients in whom FISH had failed due to low cell numbers, as well as additional high-risk  
167 secondary CNVs such as Amp1q, Del13q, and Del1p in four patients. Whole-genome  
168 sequencing confirmed the IgH translocations, hyperdiploidy, and secondary CNVs in 10  
169 patients with both WGS and scRNA-seq of tumor cells. No discrepancies were observed  
170 between scRNA-seq and WGS. Overall, for ten patients where FISH failed due to a low  
171 number of cells, scRNA-seq and WGS data existed and we were able to resolve the  
172 cytogenetic abnormalities for these cases. Notably, the first aspirate pull was used for  
173 clinical-grade FISH testing, while later pulls were used for research-level WGS and  
174 scRNA-seq; given the frequent hemodilution observed in later aspirate pulls which further  
175 decreases the number of tumor cells in the specimen, these results showcase the  
176 superior sensitivity in tumor cell detection and characterization of these methods  
177 compared to FISH. Further, by reviewing pre-screening FISH reports and incorporating  
178 primary translocation data from treatment records for remaining failures, we obtained

179 cytogenetic data for 49 out of 55 individuals. Since we did not have whole-exome  
180 sequencing or WGS data on all patients, we refrained from assessing the impact on  
181 outcomes of certain high-risk mutations, including MAPK mutations, DNA repair  
182 mutations, or MYC alterations, which have been previously identified as high risk<sup>8,10,12</sup>.

### 183 Safety

184 Toxicity results are summarized in **Table 2**. Thirty-six percent of patients experienced a  
185 grade 2 toxicity, 62% experienced a grade 3 toxicity and 9% experienced a grade 4  
186 toxicity. The most common treatment-related toxicities of any grade included leukopenia  
187 in 44 patients (80%), neutropenia in 43 patients (78%), fatigue in 42 patients (76%), rash  
188 in 38 patients (69%), and diarrhea in 37 patients (67%). The most common grade 3  
189 treatment-related hematologic toxicities were neutropenia in 14 patients (25%),  
190 leukopenia in 10 patients (18%), lymphopenia in 6 patients (11%), and thrombocytopenia  
191 in 4 patients (7%). Non-hematologic grade 3 toxicities included hypophosphatemia in 7  
192 patients (13%) and rash in 5 patients (9%). Grade 4 toxicities related to study treatment  
193 included hyperglycemia (n = 1/55; 2%), hypokalemia (n = 1/55; 2%), lymphopenia (n =  
194 2/55; 4%), neutropenia (n = 2/55; 4%), and thrombocytopenia (n = 1/55; 2%). One patient  
195 developed a grade 5 intracranial hemorrhage 3 weeks after completion of therapy that  
196 was not related to the study intervention; the patient was on therapeutic anticoagulation  
197 with a history of atrial fibrillation and the event was considered unrelated by the patient's  
198 treating physicians.

199 Five patients developed secondary malignancies (one instance each of prostate,  
200 head/neck, ovarian, uterine and melanoma). Three of five patients were diagnosed  
201 following the completion of treatment on protocol and remained on follow-up while  
202 receiving active treatment for secondary malignancy. The remaining two patients were  
203 diagnosed during active treatment; one participant delayed treatment for secondary  
204 malignancy (prostate) to finish protocol therapy and remained on study through the end  
205 of protocol-based follow-up. The other patient diagnosed during active treatment  
206 discontinued therapy to receive treatment for their secondary malignancy (melanoma)  
207 and remained on follow-up. No patients were diagnosed with myelodysplastic syndrome  
208 or other myeloid malignancies.

209 Dose modifications occurred in 34 patients (62%) during the study therapy. The median  
210 number of modifications was 1 (range 1-4) and dose delays due to toxicity occurred in 19  
211 patients (35%). The most common reason for dose modification of ixazomib was  
212 peripheral neuropathy (10 patients, 18%). Stem cells were collected from all eligible  
213 patients by the end of the induction phase and there was one patient who failed to  
214 mobilize stem cells.

215 The median number of cycles completed was 24 (range: 2-24). Five patients discontinued  
216 therapy prior to the planned 24 cycles. Reasons for discontinuation included worsening  
217 unrelated co-morbid conditions (n=3), treatment for a different malignancy (n=1), and  
218 withdrawal of consent (n=1). No patients discontinued treatment due to toxicity.

## 219 Efficacy

220 The overall response rate (partial response or better) based on International Myeloma  
221 Working Group (IMWG) criteria<sup>23</sup> was 93% (n=51), with complete response (CR)  
222 observed in 17 patients (31%), VGPR in 8 patients (15%), and partial response in 26  
223 patients (47%) (**Table 3**). All patients who achieved CR also achieved a stringent and  
224 sustained CR for at least 6 months with responses deepening over time (**Figure 2**).  
225 Twenty-five patients (45%) achieved a VGPR or better response and minimal response  
226 or better was observed in 98% of patients (n=54). The overall response rate was similar  
227 for patients in different 20/20 risk groups: low (100%), intermediate (90%), and high  
228 (92%) (Cochran-Armitage test, p=0.55).

229 Eight participants progressed to overt MM defined by the SLiM-CRAB myeloma-defining  
230 events (MDEs)<sup>24</sup> (**Figure 2**). All eight patients experienced biochemical progression  
231 concurrent with or prior to developing SLiM-CRAB progression (**Figure 2**). One patient  
232 discontinued protocol therapy after one cycle due to unrelated comorbid conditions  
233 including colitis and atrial fibrillation and remained on follow-up for ten months prior to  
234 SLiM-CRAB progression. The remaining seven progressors completed all twenty-four  
235 cycles of protocol therapy and continued on follow-up prior to progression. Four of eight  
236 progressors had an MDE within one year of their final treatment, and the median time to  
237 progression for the remaining four progressors was 21 months (range: 13.2-32.7 months).  
238 Four patients developed lytic bone disease noted on PET and MRI during follow-up, one  
239 patient developed renal failure and hypercalcemia 9 months after completion of therapy  
240 (after showing biochemical progression at 6 months post-therapy), one patient developed  
241 anemia 17 months post-therapy after showing biochemical progression at 6 months post-  
242 therapy, one patient met SLiM-CRAB criteria at 13 months post-therapy with FLC ratio >  
243 100 and BMPCs of 60% prompting initiation of therapy and one patient met SLiM-CRAB  
244 criteria at 13 months post-therapy with FLC ratio >100 . Seven of the eight had at least  
245 one high-risk genetic event at baseline [1q gain (n=4), Del13q (n=5), Del17p (n=2, one  
246 confirmed from FISH tests and one identified in a pre-screening FISH report from patient  
247 records), Del1p (n=3), t(14;16) (n=1), KRAS (n=2), TP53 (n=1)] (**Figure 1B**). Among all  
248 progressors, the best response achieved was PR with none achieving VGPR or better.

249

## 250 Time-to-event analyses

251 The median follow-up for all 55 patients was 50 months (range: 8-61 months). Thirty  
252 patients had biochemical progression events (**Figure 2**). Biochemical progression was  
253 defined as a 25% increase in serum or urine M protein or a difference between involved  
254 and uninvolved FLC levels based on the IMWG criteria<sup>25</sup>.

255 The total number of patients who were followed for at least two years and remained  
256 biochemical progression-free (including the censored patients who came off therapy  
257 with or without progression) was 50 of 55 patients (91%; 90% CI: 82 - 96%, p < 0.001,  
258 one-sided exact binomial test) (**Figure 3A**).

259

260 Progression-free survival for the primary endpoint was defined as the development of  
261 end-organ damage per the SLiM-CRAB criteria or death. Participants who were not  
262 followed for at least two years, yet remained alive and progression-free while on trial,  
263 were censored at the last date known progression-free. The total number of patients who  
264 remained progression-free without SLiM-CRAB criteria or death within two years of  
265 enrollment was 52 of 53 patients (98%) (**Figure 3B**). One patient developed SLiM-CRAB  
266 progression within 2 years of enrollment after discontinuing therapy (described above).  
267 No patients developed SLiM-CRAB progression while on active therapy (**Figure 3B**).

268 Median biochemical PFS was 48.6 months (95% CI: 39.9 – not reached; NR) and median  
269 overall survival has not been reached (**Figure 3 A, C**). The median duration of response  
270 was 47.4 months (95% CI: 37 – NR) and the median time to progression was 49.9 months  
271 (95% CI: 39.9 – NR).

#### 272 Subsequent treatments for those with biochemical progression but not SLiM-CRAB

273 Eleven patients started new treatments on SMM-directed clinical trials following the  
274 completion of protocol therapy prior to the development of SLiM-CRAB progression. Of  
275 these, ten experienced biochemical progression while on follow-up (**Figure 2**) and had  
276 an evolving pattern leading to enrollment in a subsequent clinical trial. Evolving pattern  
277 was defined as an increase of 10% in the M-spike concentration or the involved free light  
278 chain concentration during the 6 months prior to screening for the clinical trial. Four  
279 patients met high-risk criteria per the 20/2/20 model on follow-up. These patients elected  
280 not to wait for end-organ damage on follow-up and proceeded with therapy on another  
281 trial of HR-SMM.

#### 282 Factors that impact progression-free survival

283 We next assessed several baseline characteristics to determine factors that define the  
284 population that benefits the most from a lenalidomide-based regimen and further  
285 identified endpoints that can be early biomarkers for end-organ damage in this population.  
286 We examined baseline characteristics including the 20/2/20 model, evolving subtype,  
287 high-risk cytogenetics, the best response to therapy, as well as the combination of  
288 response, high-risk cytogenetics, and minimal residual disease (MRD). These criteria  
289 were used based on their association with prognosis in prior studies of overt MM in a prior  
290 post hoc assessment in lenalidomide studies of SMM<sup>26,27</sup>.

291 We first determined whether the baseline 20/2/20 criteria helped identify patients who  
292 would have a prolonged PFS in response to therapy. We combined low- and intermediate-  
293 -risk patients and compared them to high-risk patients. Here, we showed that the median  
294 PFS was longer but not statistically significant at 57.8 months for the low-/intermediate-  
295 risk group compared to 37.2 months for high-risk patients (log-rank,  $p = 0.08$ ) (**Figure**  
296 **3D**). The median duration of response was significantly shorter at 31.6 months in high-  
297 risk patients compared to 56.9 in the low/int group (log-rank,  $p = 0.046$ ) (**Figure 3E**).



298 Evolving disease was assessed in all participants as part of the eligibility criteria and as  
299 described above this was defined as a 10% or greater increase in either the M-spike  
300 concentration or the involved free light chain concentration within the 6 months preceding  
301 clinical trial screening. Of all patients that enrolled in the clinical trial (N=55), an evolving  
302 pattern was found in 29 out of 55 patients (53%) while 26 out of the 55 patients (47%) did  
303 not have an evolving pattern (**Table 1**). The median time of the lab result was 107 days  
304 prior to the screening date with an interquartile range of 120 days. The presence of  
305 evolving disease at baseline was similar across baseline IMWG 20/2/20 risk groups: low  
306 (56%), intermediate (48%), and high (56%) (Cochran-Armitage,  $p=0.83$ ). Of the patients  
307 that demonstrated an evolving pattern, only 31% ( $n=9/29$ ) achieved a VGPR or better,  
308 and of those that did not demonstrate an evolving pattern, 62% ( $n=16/26$ ) achieved a  
309 VGPR or better (Fisher's exact,  $p=0.032$ ).

310 In patients who did not demonstrate an evolving pattern, the PFS was significantly longer  
311 at 53.4 months compared to 40.1 months in those who had evolving disease prior to  
312 registration (log-rank,  $p=0.025$ ). Additionally, in patients who did not demonstrate an  
313 evolving pattern, the median duration of response was not reached and was significantly  
314 longer compared to that in patients who had an evolving subtype (37.9 months; log-rank,  
315  $p=0.034$ ) (**Figure 4A-D**).

316 We next examined whether patients with VGPR or CR had an improved progression-free  
317 survival. Response has been associated with PFS in studies of overt MM<sup>28</sup>. However, this  
318 has not been previously shown in studies of smoldering myeloma partially because the  
319 previous studies using lenalidomide and dexamethasone had few cases of CR and  
320 partially for the short follow-up period of the quadruplet regimens being currently  
321 assessed in SMM. We, therefore, aimed to determine whether depth of response is  
322 associated with progression in the SMM setting. Indeed, we demonstrated that patients  
323 who showed VGPR or better had a median time to progression (TTP) of 58.2 months  
324 compared to 31.3 months in patients who showed inferior responses (log rank,  $p < 0.001$ ;  
325 **Figure 5 A**). Interestingly, this was still true in patients with high-risk cytogenetics as  
326 determined by FISH only (median PFS 31.3 months vs 53.4 months, log-rank,  $p = 0.002$ )  
327 or by FISH and whole genome sequencing(WGS) (median PFS of 30.8 months vs 53.4  
328 months,  $p < 0.001$ ), demonstrating that depth of response is relevant for prognostication  
329 independent of cytogenetics (**Figure 5 B,C**).

330 All patients who achieved a complete response (CR) maintained it for at least 6 months.  
331 The median duration of response in the sustained CR group was not reached at the time  
332 of analysis, while the median duration of response in the non-CR group was 35.5 months  
333 (log-rank,  $p = 0.0016$ ) (**Figure 5D**). Similarly, the median progression-free survival in the  
334 sustained CR group was not reached, compared to 38 months in the non-CR group (log-  
335 rank,  $p = 0.0018$ ) (**Figure 5E**).

336

337 Minimal Residual Disease

338 Twenty-five patients were evaluable for MRD (achieved VGPR or better) by next-  
339 generation sequencing (NGS), 11 out of 25 had no samples available for MRD testing or  
340 had a quality control (QC) failure. Twenty-three samples at C9 or EOT from 14 out of 25  
341 patients passed the QC analysis and were available for MRD testing. A sensitivity of  $10^{-5}$   
342 was reached in 22/23 (96%) samples and a sensitivity of  $10^{-6}$  in 17/23 samples (74%)  
343 (**Suppl Figure S1**). Out of patients who showed a VGPR or better response and had  
344 MRD testing (n=14), 29% (4/14) were MRD negative at  $10^{-5}$  at EOT and none developed  
345 biochemical or clinical progression over the follow-up period. Of those who were MRD  
346 positive at  $10^{-5}$  (n=10/14), 6 patients developed biochemical progression during the follow-  
347 up period. Two MRD time points (C9 and EOT) were available in a subgroup of 8  
348 individuals. Of those, 50% (4/8) were MRD positive at  $10^{-5}$  at C9 and remained so at EOT,  
349 while 50% (4/8) were MRD negative at  $10^{-5}$  at C9 but only 1 patient remained MRD  
350 negative at EOT, and 3 converted to MRD positive. The 3 patients that converted from a  
351 C9 MRD negative at a sensitivity of  $10^{-5}$  to positive at EOT developed biochemical  
352 progression during the follow-up period. The 5-year progression-free survival rate of  
353 patients who achieved MRD negativity at  $10^{-5}$  was 100%, compared to 40% of MRD-  
354 positive patients (log-rank,  $p = 0.051$ ) (**Figure 6**).

#### 355 Mass Spectrometry MRD assessment

356 MALDI-TOF mass spectrometry was available at baseline and C9 in 43 patients. The M-  
357 protein was undetectable in 4 patients at C9 (10%). Since clearance of M-protein could  
358 take more time than tumor cell clearance in the BM, we tested the serum of patients by  
359 MALDI-TOF in available serum samples during maintenance at 2-6 months after C9 (at  
360 C11 to 16). 37 were retested during maintenance: six were negative (including the 4 that  
361 were negative at C9) and 31 remained positive. At EOT, MALDI-TOF was performed for  
362 41 patients. Eight (20%) were negative: 6 out of 8 confirmed a previous negative result,  
363 one case turned negative from a previous positive result, and one had a negative result  
364 from baseline with no testing during treatment. The concentration calculated using the  
365 EXENTi software positively correlated with that calculated via SPEP at diagnosis, C9 and  
366 EOT ( $p < 0.0001$ ) (**Suppl Figure S3**). Of the patients with negative MALDI-TOF at EOT  
367 (n=8), 4 developed biochemical progression, and none developed SLiM-CRAB  
368 progression. In patients who achieved a negative MALDI-TOF result at EOT, the median  
369 progression-free survival was 53.46 months compared to 38.01 months in patients who  
370 had a positive MALDI-TOF result at EOT (log-rank,  $p=0.08$ ) (**Suppl Figure S4**).

371  
372 We compared residual disease detection using serum immunofixation (IFX) with MALDI-  
373 TOF in 86 measurements. While both tests are significantly concordant (Table S1,  
374 Cohen's  $\kappa=0.64$ ,  $p < 0.001$ , 95% CI [0.44, 0.84]) and no patients had a positive IFX test  
375 and a negative MALDI-TOF test, MALDI-TOF identified some cases missed by IFX (10  
376 IFX-negative MALDI-TOF-positive cases). Therefore, MALDI-TOF might be more  
377 sensitive than IFX for detecting residual disease.

378

379 **Single-cell RNA sequencing reveals tumor-intrinsic and extrinsic factors**  
380 **associated with disease progression**

381  
382 To identify biological predictors of response and resistance to IxaRD in baseline samples  
383 from patients with HR-SMM, we performed single-cell RNA sequencing on CD138+ and  
384 CD138- cells as well as WGS on 22 patients enrolled on the study (14 biochemical  
385 progressors, 8 non-progressors) and 11 Healthy donors (**Figure 7A**). Among the  
386 progressors in this subcohort, 5 patients met SLiM CRAB criteria (**Figure 7A**).

387  
388 Overall, we identified 125,572 plasma cells (Patients: malignant, n=50,591; normal,  
389 n=1876; HD: n=73,105) (**Figure 7B-D**). To identify tumor-intrinsic transcriptomic  
390 alterations associated with biochemical progression post-IxaRD in patients with HR-SMM,  
391 we performed differential expression analysis comparing tumor cells from patients who  
392 progressed (n=10) to those who did not (n=3). To restrict the influence of individual tumors  
393 on the analysis, as well as to control for the lower number of non-progressors in this sub-  
394 cohort, we randomly sampled the same number of tumor cells from progressors and non-  
395 progressors (~2100 per group) and balanced the contribution of each individual towards  
396 the group (progressors: ~210 cells per patient; non-progressors: 700 cells per patient;  
397 **Figure 7E**). Additionally, to control for differences in sequencing depth, we downsampled  
398 20K reads per cell across all cells used in this analysis. We observed consistently higher  
399 expression levels of MHC class I genes (*HLA-A*, *HLA-B*, *HLA-F*, *HLA-E*, *B2M*) in tumor  
400 cells from non-progressors to progressors (**Figure 7E**). To validate this observation, we  
401 analyzed bulk RNA-sequencing data from an external cohort of MM patients treated with  
402 a Bortezomib-based regimen, a different proteasome inhibitor (PADIMAC, GSE116234).  
403 This analysis confirmed that tumor cells from patients who respond well to proteasome  
404 inhibition show higher levels of MHC-I genes (**Figure 7F**). Notably, the PADIMAC study  
405 did not use Lenalidomide in combination with proteasome inhibition, which was the case  
406 in our study. This supports the notion that the observed association with MHC-I levels is  
407 related to proteasome inhibition specifically rather than a particular combination.

408 These results suggest that antigen presentation via MHC-I by tumor cells may be  
409 important for response to proteasome inhibition and implicate the immune system in  
410 mediating response. While the immune system has been thought to potentiate the effects  
411 of proteasome inhibition through increased neoantigen presentation by immune cells  
412 following tumor cell killing, it has not been previously linked to tumor-intrinsic  
413 transcriptomic alterations<sup>29</sup>. To pursue this hypothesis further, we turned our attention to  
414 the cytotoxic CD8+ T cell compartment, which is tasked with responding to MHC-I-bound  
415 tumor-derived antigens. Overall, we sequenced 51,326 T-cells, including 5,045 granzyme  
416 K (GZMK)-expressing and 9,026 granzyme B (GZMB)-expressing cytotoxic T cells  
417 (**Figure 7G**). First, we systematically compared the frequency of clonal expansion within  
418 the GZMK+ and the GZMB+ compartment between progressors and non-progressors.  
419 We observed that the GZMK+ compartment was significantly more clonally expanded in  
420 progressors compared to non-progressors (bootstrapping, two-sided p<0.001) (**Figure**  
421 **7H**), but this was not seen in the GZMB+ compartment. By comparing the frequency of  
422 the GZMB+ phenotype within clonally expanded T cells from progressors and non-  
423 progressors, we observed a significant decrease in differentiation towards the GZMB+  
424 phenotype in progressors (Wilcoxon, two-sided p=0.048) (**Figure 7 I, J**). This suggests

425 that clonally expanded effector cytotoxic T cells from progressors may be less mature  
426 compared to non-progressors. To gain more insight into the functionality of clonally  
427 expanded GZMB+ cytotoxic T cells, we performed differential expression analysis  
428 between progressors and non-progressors. We observed that clonally expanded GZMB+  
429 cytotoxic T cells from non-progressors showed higher expression levels of genes related  
430 to cytotoxicity and activation, such as *TYROBP*, *CXCR4*, and members of the AP-1  
431 pathway, compared to progressors (**Figure 7K**). Clonally expanded GZMB+ cytotoxic T  
432 cells from progressors showed higher levels of GIMAP genes, which may be associated  
433 with increased apoptosis<sup>30</sup>, and *THEMIS*, which can suppress cytotoxic responses<sup>31</sup>,  
434 however higher levels of maturation markers *ITGB1* and *CX3CR1* were also observed,  
435 suggesting that the functionality of clonally expanded GZMB+ cytotoxic T cells may be  
436 more nuanced.  
437 Overall, this suggests that clonally expanded cytotoxic T cells from progressors are  
438 phenotypically less mature, and potentially less functional, compared to those from non-  
439 progressors, which could be related to the observed differences in MHC-I expression in  
440 tumor cells. This data implicates immune dysfunction as a potential correlate of  
441 suboptimal response to proteasome inhibition.

## 442 **Discussion**

443  
444  
445 Optimal management of HR-SMM continues to evolve with many novel approaches  
446 currently under investigation to deliver highly effective therapy to prevent end-organ  
447 damage while limiting toxicity. There have been phase III studies of lenalidomide and  
448 dexamethasone demonstrating improvement in progression-free and overall survival and  
449 there are ongoing studies utilizing triplets or quadruplets that include monoclonal  
450 antibodies with proteasome inhibitors, lenalidomide, and dexamethasone. The ixazomib,  
451 lenalidomide, and dexamethasone combination in this study demonstrated high response  
452 rates with many patients experiencing deep responses, with VGPR or better in nearly half  
453 of the patients treated as well as the benefit of an all-oral approach. No patients  
454 progressed to overt MM during study therapy and the regimen was overall well-tolerated.  
455 The response rates and safety were comparable to results seen in clinical trials of  
456 ixazomib, lenalidomide, and dexamethasone of newly diagnosed and relapsed MM<sup>32,33</sup>.  
457 The median PFS of 48.9 months also compares favorably to previously reported clinical  
458 trials of triplet combination regimens in SMM<sup>19,20</sup>.

459  
460 Because of the long follow-up of a median of 50 months and the depth of response  
461 achieved in half of the patients, we have an opportunity to answer critical questions about  
462 the management of early intervention in HR-SMM.

463  
464 A controversial question in SMM trials is whether depth of response matters in trials of  
465 HR-SMM. Previous studies using lenalidomide alone or lenalidomide and  
466 dexamethasone demonstrated a long-term benefit and delay of end organ damage even  
467 if the best response was only PR. The argument was that immune equilibrium may be re-  
468 instated in those patients and deep remission is not required. However, other studies  
469 using “curative intent” argued that achieving a depth of response similar to overt MM is  
470 the most optimal way to achieve long-term remission. Here, we show for the first time that

471 a depth of response of VGPR or greater correlated with time to progression, suggesting  
472 that deep response is impactful in SMM similar to overt MM. This was particularly  
473 highlighted in patients with cytogenetically high-risk disease, where PFS was only 30.8  
474 months in patients with less than VGPR.

475  
476 The next question was whether MRD is associated with improved PFS. Although the  
477 numbers were small, we were still able to see near-significant differences in the PFS of  
478 MRD negative cases compared to those who did not achieve or sustain MRD negativity.  
479 Ongoing studies with deeper remissions with quadruplet therapy or immunotherapy will  
480 help further address this question more definitively.

481  
482 We then examined the correlation of biochemical progression with the development of  
483 SLiM-CRAB criteria. Thirty patients developed biochemical progression in all (27 after  
484 completion of therapy), of which 8 patients also developed SLiM-CRAB with overt MM.  
485 Eleven patients started new treatments on SMM-directed trials following the completion  
486 of protocol therapy prior to developing SLiM-CRAB progression. Of these, ten  
487 experienced biochemical progression while on follow-up and had an evolving pattern  
488 leading to enrollment in a subsequent clinical trial. Four of these patients met high-risk  
489 criteria per the 20/2/20 model. This is consistent with our clinical observation that patients  
490 who opt to be treated initially for HR-SMM do not want to wait for the development of end-  
491 organ damage prior to re-initiating therapy, consistent with recent discussions to consider  
492 biochemical progression as an end-point of therapy rather than SLiM-CRAB<sup>34</sup>. In addition,  
493 it brings up a critical question of whether re-treatment on a trial of SMM should be in the  
494 same cohort with other participants who were never exposed to therapy or in a separate  
495 cohort. Additional guidance is necessary to determine which patients would be suitable  
496 for further SMM-directed therapy vs MM induction therapy.

497  
498 The strong correlation between biochemical progression and MDE also points out that  
499 biochemical progression can be used as a surrogate for MDE in high-risk SMM. However,  
500 the number of patients is small, and other studies need to further confirm this observation.

501  
502 Interestingly, the use of 20/2/20 criteria in our study demonstrated that responses were  
503 similar across all risk criteria, but the progression-free survival was shortest for those who  
504 were high-risk per 20/2/20. This indicates that high-risk 20/2/20 patients may resemble  
505 MM and may require more aggressive therapy or maintenance therapy. We did not have  
506 an observation control arm in this study, so we cannot assess whether achieving  
507 response in these patients truly alters their long-term risk of progression to MM.

508  
509 Moreover, the use of evolving subtype helped capture those with increasing biomarkers  
510 regardless of their disease burden. The best response to treatment was not similar in  
511 those who showed increasing biomarkers prior to receiving therapy compared to those  
512 who had fairly stable biomarkers. In patients who did not show an evolving disease pattern  
513 as defined in our eligibility criteria, the best response to therapy achieved was better,  
514 duration of response was longer, and their progression-free survival was superior  
515 compared to those who demonstrated increasing biomarkers prior to therapy. Our study  
516 highlights the benefit of including evolving disease as an indication of high-risk disease.

517 Future studies will help shed light on the importance of varying biomarkers in terms of risk  
518 stratification and the severity of disease.

519  
520 Genomic alterations are critical to better define patients who are truly at risk of  
521 progression and who may benefit from more aggressive therapy. In this study, the  
522 addition of WGS and single-cell RNA sequencing helped identify participants with high-  
523 risk cytogenetics who otherwise would not have been identified by FISH alone. We opted  
524 not to include MAPK and DNA repair pathway mutations in analyzing impact on outcomes  
525 because we did not have data available on all patients. With additional data, we were able  
526 to indeed define a population of high-risk cytogenetics and poor response to therapy who  
527 showed the worst outcome.

528  
529 Minimal residual disease was performed with two approaches in this protocol: standard  
530 FDA-approved NGS on BM samples achieving at least VGPR and very sensitive MALDI-  
531 TOF mass spectrometry. MALDI-TOF was assessed on peripheral blood serum, avoiding  
532 bone marrow biopsy, and is gaining more and more interest in the field. We showed that  
533 MALDI-TOF is a sensitive and accurate assay for monitoring M protein isotype and  
534 quantification, with a concordance with SPEP at baseline and a strong prognostic effect  
535 after EOT. We showed that MALDI-TOF is superior to IFX with 100% NPV and 83% PPV,  
536 similar to previous studies<sup>35</sup>.

537  
538 We performed an integrative study combining WGS and single-cell RNA-sequencing of  
539 tumor and immune cells with the IRD study. To identify tumor-specific gene expression  
540 differences that associated with IRD treatment response, we compared gene expression  
541 in tumor cells at baseline from progressor and non-progressor patients who  
542 received IRD. We observed significantly higher levels of MHC class I genes in tumor cells  
543 from non-progressor patients compared to progressors. We further validated this finding  
544 using data from an external study on MM patients treated with a different proteasome  
545 inhibitor (Bortezomib), suggesting a broader link between MHC-I levels and response to  
546 proteasome inhibition. To further explore the immune system's involvement, we  
547 analyzed cytotoxic CD8+ T cells, which recognize and eliminate cells presenting specific  
548 antigens on their surface via MHC-I molecule. We compared the clonal expansion of two  
549 T cell subsets, granzyme K (GZMK)+ and granzyme B (GZMB)+, and found that  
550 progressors exhibited greater clonal expansion in the GZMK+ compartment compared to  
551 non-progressors, suggesting a potentially ineffective immune response. We have  
552 previously shown that the GZMK+ compartment is the major source of expression of PD-  
553 1, a key T cell exhaustion marker <sup>20</sup>. Additionally, progressors showed a reduced  
554 proportion of the GZMB+ phenotype within their clonally expanded T cells,  
555 suggesting their clonally expanded T cells have a less mature cytotoxic profile compared  
556 to those of non-progressors. We next analyzed functional differences in T cells between  
557 progressors and non-progressors. Gene expression patterns revealed higher expression  
558 of genes related to cytotoxicity and activation in the non-progressors' clonally expanded  
559 GZMB+ T cells compared to those of the progressors. Clonally expanded GZMB+ T  
560 cells from progressors showed increased expression of genes associated with apoptosis  
561 and suppression of cytotoxic responses, alongside markers of maturation. This suggests  
562 a more complex picture of functionality in these T cells from progressors. Our findings

563 suggest that immune dysfunction related to changes in tumor intrinsic antigen  
564 presentation at baseline may contribute to suboptimal responses in proteasome inhibitor  
565 therapy.

566  
567 Our study has several limitations including the non-randomized nature of the trial without  
568 a control arm and the potential selection bias in any single-center experience. Several  
569 questions remain, including optimal timing of therapy in HR-SMM, duration of therapy,  
570 treatment modality (combinations, immunotherapy), and response adaptive approaches.  
571 The limited size of the scRNAseq sub-cohort and lack of functional validation limit the  
572 conclusiveness of the findings and require further validation in larger, independent  
573 cohorts.

574  
575 In conclusion, this is the first trial studying an all-oral triplet combination of ixazomib,  
576 lenalidomide, and dexamethasone in HR-SMM, demonstrating substantial efficacy and  
577 identifying several factors critical in the outcome of patients: depth of response, evolving  
578 pattern, MRD negativity and high risk 20/2/20. Future studies using quadruplet therapy or  
579 immunotherapy may alter these conclusions.

## 580 **Methods**

581  
582  
583 The research study was approved by the Dana-Farber/Harvard Cancer Center  
584 institutional review board (protocol number DFCl 16-313) and complied with all relevant  
585 ethical and legal regulations. All participants gave written informed consent. The  
586 clinicaltrials.gov registration number is NCT02916771. Individual deidentified participant  
587 sequencing and FISH data will be shared.

### 588 Eligibility Criteria

589  
590  
591 Patients enrolled on the study met eligibility for high-risk SMM based on criteria by  
592 Rajkumar<sup>24</sup> as follows: bone marrow plasmacytosis  $\geq 10\%$  and  $\leq 60\%$  and any one or  
593 more of the following: serum M protein  $\geq 3$  g/dL, IgA isotype, immune paresis with  
594 reduction of 2 uninvolved immunoglobulins, serum involved/uninvolved ratio of  $\geq 8$  but  
595  $\leq 100$ , bone marrow plasmacytosis 50-60%, abnormal plasma cell immunophenotype,  
596 high-risk FISH defined as t(4;14), del 17p or 1q gain, increased circulating plasma cells,  
597 MRI with diffuse abnormalities or 1 focal lesion, PET/CT with one focal lesion with  
598 increased uptake without underlying osteolytic bone destruction and urine monoclonal  
599 light chain excretion  $\geq 500$ mg/24 hours. Patients with evidence of SLiM-CRAB criteria  
600 were excluded (bone marrow plasmacytosis  $> 60\%$ , light chain ratio  $> 100$ )<sup>36</sup>. Patients  
601 were required to have an ECOG performance status of  $\leq 2$  and adequate hematologic and  
602 organ function prior to enrollment. A creatinine clearance of  $\geq 30$  mL/min was required.

### 603 Treatment Regimen

604  
605  
606 Patients were treated on an outpatient basis with 9 cycles of induction therapy consisting  
607 of ixazomib 4mg given orally on days 1, 8, and 15, in combination with lenalidomide 25mg  
608 administered orally on days 1 through 21 and dexamethasone 40mg administered orally

609 on days 1, 8, 15, and 22 of a 28-day cycle. The induction phase was followed by  
610 maintenance therapy, consisting of ixazomib 4mg on days 1, 8, and 15 and lenalidomide  
611 15mg on days 1-21 without dexamethasone for another 15 cycles. Treatment duration  
612 was a total of 24 cycles (2 years).

613

### 614 Objectives and End Points

615

616 The primary objective was to determine the proportion of patients with HR-SMM who are  
617 progression-free 2 years after receiving trial therapy. Progression for the primary endpoint  
618 was defined as the development of end organ damage per SLiM-CRAB criteria.  
619 Secondary objectives included response rates, duration of response, progression-free  
620 survival, safety of the combination therapy, and minimal residual disease (MRD)  
621 negativity. Mass spectrometry analysis was also performed to correlate with IMWG  
622 response and MRD status.

623

### 624 Minimal Residual Disease Assessment and Mass Spectrometry

625

626 MRD was assessed by the next-generation sequencing (NGS) ClonoSEQ® assay  
627 (Adaptive Biotechnologies, Seattle, WA, USA) on bone marrow samples from patients  
628 who achieved at least a very good partial response (VGPR) at cycle 9 (C9) or later. When  
629 BM was available, a second MRD assessment was performed to confirm the MRD result.  
630 Quality control (QC) of NGS results was performed as previously described<sup>37</sup>.

631

632 Minimal residual disease by next-generation sequencing was evaluable in 25 patients  
633 who achieved at least a VGPR. Baseline pre-treatment bone marrow samples were  
634 available for 22/25 patients and were analyzed for the identification of the VDJ molecular  
635 marker by the Adaptive MRD assay. Twenty out of 22 (91%) baseline samples passed  
636 the QC analysis, and the molecular marker was identified in 18/22 patients (82%). For  
637 MRD analysis of these 18 patients, bone marrow samples that were available from end  
638 of induction (C9) and from the end of treatment (EOT) were used for sequencing. Three  
639 of the 18 patients did not have any sample available for MRD analysis and one sample  
640 had indeterminate results at limits of detection, 13 patients had MRD testing at the end of  
641 induction (C9), 10 at EOT, and 8 individuals had an assessment at both timepoints for an  
642 overall total of 23 samples tested for MRD.

643

644 Residual disease after therapy was also assessed by matrix-assisted laser desorption  
645 ionization-time of flight (MALDI-TOF) mass spectrometry to quantify M proteins (Binding  
646 Site Group, Birmingham, UK), and Optilite free light-chain assay to quantify IgG, IgA, IgM,  
647 and serum free light chains. EXENT-iQ software (Binding Site Group, Birmingham, UK)  
648 was used for quantitative analysis of detected M proteins. The lower limit of accurate M  
649 protein quantification by MALDI-TOF mass spectrometry was 0.015 g/L. Serum (500 µL)  
650 was tested using the EXENT system and immunoglobulin (Ig) isotype assay<sup>38</sup>. The unique  
651 mass/charge (m/z) (+/- 5) of a monoclonal light chain and the isotype were defined at  
652 baseline and tracked in each patient's samples after therapy at the end of induction (C9)  
653 and when available during maintenance (2-3 months after C9) and at end of treatment  
654 (EOT). MALDI-TOF was performed at baseline before treatment in 48 patients out of 55.



655 Seven out of 55 patients were excluded due to sample unavailability (n = 5/7) and light  
656 chain-only disease at baseline (n = 2 out of 55), defined as having a negative SPEP and  
657 serum immunofixation (IFX) result in the setting of SMM (**Suppl Figure S2**). We assessed  
658 the concordance between Isotype by MALDI-TOF and SPEP-IFX and the correlation  
659 between quantified M protein at baseline with the two methods using Pearson correlation.  
660 The concordance between NGS MRD results and residual disease by MALDI-TOF was  
661 also assessed by comparing the presence of residual M protein >0.015 g/L (limit of  
662 detection)<sup>39</sup> and positivity at 10<sup>-5</sup> by NGS. Concordance between MS by MALDI-TOF, IFX,  
663 and NGS in BM was assessed using Cohen's kappa ( $\kappa$ ) statistic, with  $\kappa$  value  
664 interpretation per Landis and Koch<sup>40</sup>.

665

#### 666 DNA isolation and library construction

667 Genomic DNA isolation was carried out using the Monarch Genomic DNA Purification Kit  
668 (New England Biolabs), with tumor (PCs) and normal (PBMCs) yields quantified by Qubit  
669 3.0 fluorometer (Thermo Fisher Scientific). 50-100ng was taken forward for DNA  
670 sequencing library preparation using the NEBNext Ultra II FS DNA Library Prep kit (New  
671 England Biolabs) with unique dual index adapters (NEBNext Multiplex Oligos) according  
672 to manufacturers' instructions. Final library fragment sizes were assessed using the  
673 BioAnalyzer 2100 (Agilent Technologies), and yields were quantified by Qubit 3.0  
674 fluorometer (Thermo Fisher Scientific) and qPCR (KAPA Library Quantification Kit).

675

#### 676 Whole genome sequencing (WGS) and genomic data analysis

677 WGS was available for 17 patients. Final sample libraries were normalized and pooled  
678 before WGS was performed on Illumina NovaSeq 6000 S4 flow cells, 300 cycles 2x150bp  
679 paired-end reads, at the Genomics Platform of the Broad Institute of MIT and Harvard.  
680 WGS analysis was performed on an in-house cloud-based HPC system for copy-number  
681 and structural variant analyses, as previously described<sup>41</sup>. Sequencing reads were  
682 aligned to the GRCh38 reference genome with the bwa mem v0.7.7 algorithm<sup>42</sup>, duplicate  
683 reads were marked with MarkDuplicates from picard v1.457, indels were realigned with  
684 GATK 3.4 IndelRealigner, and base qualities were recalibrated with GATKBQSR. WGS  
685 analysis was performed with the Cancer Genome Analysis workflow from the Cancer  
686 Program at Broad Institute of MIT and Harvard on an in-house cloud-based HPC system.  
687 Small indels were called with Strelka2 and were filtered (i) against a panel of normals  
688 (PoN), (ii) for potential technical artifacts (oxoG), and (iii) for multiple alignment with  
689 BLAT<sup>43</sup>. After copy-number normalization with AllelicCapSeg, ABSOLUTE solutions were  
690 manually reviewed to estimate mutation CCF, purity, and ploidy of tumor samples<sup>44</sup>.  
691 Structural variants were detected and filtered as previously described<sup>45</sup>.

692

#### 693 Patient sample processing for scRNA-seq

694 Whole bone marrow aspirates (5-20mLs) were drawn into EDTA preservative tubes and  
695 kept at 4°C before being processed within a 6 hours from collection. Bone marrow  
696 mononuclear cells were isolated from aspirates using density gradient centrifugation.  
697 Briefly, the bone marrow was filtered to remove any clots or bone debris, diluted 1:3 with  
698 1X Phosphate-Buffered Saline (PBS), and gently poured above 15mLs of Ficoll-Paque  
699 density gradient medium within a SepMate™ PBMC isolation tube (StemCell  
700 Technologies, Cat # 85450). After centrifugation at 1200 rcf/g for 15 minutes, PBMCs

701 were poured away from unwanted cells and washed twice with ice-cold 1xPBS prior to  
702 plasma cell enrichment. Plasma cells were enriched from the bone marrow samples using  
703 CD138 magnetic bead separation using single-column positive selection (Miltenyi Biotec,  
704 Cat #130-097-614).

705  
706

#### 707 Single-cell RNA/V(D)J library construction and sequencing

708 Sequencing libraries were prepared from BM samples, including 5' scRNA-seq libraries  
709 and scBCR-seq and scTCR-seq libraries. After MACS enrichment, all CD138+ and  
710 CD138- cells were centrifuged at 300 rcf/g for 5 mins and washed twice with an ice-cold  
711 0.1% Ultrapure Bovine Serum Albumin (BSA)/PBS wash buffer. Subsequently, cells were  
712 either subjected to volume reduction or diluted based on cell counts obtained using both  
713 a hemocytometer and a Countess automated cell counter (ThermoFisher) and cell  
714 mixtures were adjusted to obtain optimal cell densities for achieving maximal cell  
715 recovery. Samples, Gel bead-in-EMulsion (GEMs), and partitioning oil were loaded into  
716 a Next GEM Chip K microfluidic device and placed in a Chromium Controller instrument  
717 for downstream single-cell encapsulation and recovery. All GEM generation/barcoding,  
718 post GEM RT clean-up/cDNA amplification and 5' gene expression (GEX) library  
719 construction steps were completed using the Chromium Next GEM Single Cell 5' Reagent  
720 Kit v2 (Dual Index) and Library Construction Kit, according to the manufacturer's  
721 instructions. cDNA generated was also subsequently subjected to V(D)J amplification  
722 using Chromium Single Cell Human BCR Amplification Kit and Library Construction Kit  
723 for scBCR-seq and Chromium Single Cell Human TCR Amplification Kit and Library  
724 Construction Kit for scTCR-seq, according to the manufacturer's instructions. The quality  
725 of sample libraries was assessed based on library trace fragment sizes and patterns at  
726 numerous points throughout the protocol including cDNA generation, BCR V(D)J pre-  
727 amplified cDNA generation, TCR V(D)J pre-amplified cDNA generation, final GEX, final  
728 BCR and final TCR construction steps using a High-Sensitivity DNA Analysis Kit and the  
729 Bioanalyzer 2100 instrument (Agilent Technologies). Final GEX, BCR and TCR library  
730 quantification was performed using Quant-iT Picogreen dsDNA Assay Kit (Invitrogen)  
731 before preparing single pools for sequencing. Pooled libraries were sequenced on  
732 NovaSeq S4 flow cells at the Genomics Platform of the Broad Institute of MIT and Harvard  
733 (Cambridge, MA).

734  
735

#### 736 Single-cell RNA/V(D)J data processing

737 CD138+ scRNA-seq was available for 13 patients, CD138- scRNA-seq was available for  
738 20 patients and 12 patients had paired CD138+ and CD138- scRNA-seq. Paired WGS  
739 and CD138+ RNA sequencing was available for 10 patients. 20 patients had either  
740 scRNA-seq or WGS performed on their tumor samples.

741 CellRanger mkfastq (v5.0.1) was used to generate FASTQ files<sup>46</sup>. Gene expression  
742 matrices were generated by CellRanger count (v6.0.1) with the genome reference  
743 (refdata-gex-GRCh38-2020-A) provided by 10X Genomics<sup>46</sup>. To remove ambient RNA,  
744 CellBender (v0.2.0) was run on the gene expression matrices with the target false positive  
745 rate cutoff of 0.01. Poor quality cells with >15% mitochondrial gene expression, either  
746 <200 detected genes, >5,000 detected genes, <400 UMIs, or >50,000 UMIs were filtered

747 out. Three doublet tools, Scrublet (v0.2.3), scDbtFinder (v1.8.0), and scds (1.10.0) were  
748 used to calculate multiplet scores<sup>47-49</sup>. CellRanger vdj (v6.0.1) was used on FASTQ files  
749 with the VDJ reference file (refdata-cellranger-vdj-GRCh38-alts-ensembl-5.0.0)<sup>46</sup>.

750

#### 751 Malignant plasma cell identification

752 Plasma cells were first identified based on expressing key lineage markers, such as  
753 *SDC1* (encoding CD138), *CD38*, *XBP1*, *PRDM1*, *IRF4*, and *TNFRSF17* (encoding  
754 BCMA). Cell barcodes that were determined to correspond to plasma cells were  
755 considered for downstream analysis. Tumor cells were identified on the basis of belonging  
756 to the largest expanded BCR clone and clustering separately from normal plasma cells.  
757 For all clones, the isotype of the malignant clone matched that detected clinically via IFX.  
758 We annotated 50,591 of patient cells as tumor, and the rest (n=1876) as healthy plasma  
759 cells based on our tumor cell annotation protocol. The median number of tumor cells per  
760 patient was 2,148 .

761

#### 762 Single-cell TCR sequencing data processing and analysis

763 We performed single-cell TCR sequencing on CD138- samples with available single-cell  
764 RNA sequencing data (n=9). Complementary DNA generated from barcoded CD138-  
765 immune cells using Chromium Single Cell 5' Gene Expression and V(D)J enrichment kits  
766 by 10X Genomics was subjected to V(D)J enrichment and library preparation and  
767 sequenced on a NovaSeq 6000 instrument at the Genomics Platform of the Broad  
768 Institute of MIT & Harvard.

769 CellRanger v5.0.1 was used to extract FASTQ files and produce clonotype matrices<sup>50</sup> .  
770 When multiple alignments were called for a single chain, the alignment with the most  
771 UMIs was selected, and when multiple chains were called for a single cell barcode, the  
772 top two chains in terms of UMI counts were selected.

773 Clone size assignment:

774 To categorize TCR clones based on its size or its abundance within a sample, we  
775 employed a downsampling approach to account for potential sampling bias. We randomly  
776 sampled 100 T cells from each patient sample 100 times. Within each iteration, we  
777 calculated the proportion of each unique TCR clone compared to the total T cells sampled.  
778 Finally, for each clone, we averaged its proportional abundance across all iterations to  
779 obtain a more stable estimate of its size category. Categories were defined as: Rare:  
780  $\leq 1\%$ , Small:  $> 1\%$  and  $< 5\%$ , Medium:  $\geq 5\%$  and  $< 10\%$ , Large:  $\geq 10\%$ .

781 Clone-size-category proportion estimation within cell subtypes per patient sample:

782 To estimate the overall proportion of clones belonging to each size category within a cell  
783 subtype per patient sample, we again used downsampling. We randomly sampled 100 T  
784 cells from each patient cell subtype sample 100 times. In each iteration, we counted the  
785 frequency of each clone size category within the downsampled set. Finally, we averaged  
786 the frequency of each category across all iterations and these averaged frequencies were  
787 then renormalized before plotting. Two-sided p-values were computed by bootstrapping  
788 with 1000 iterations.

789

#### 790 Copy number analysis from scRNA sequencing

791 Copy number abnormalities on tumor cells were inferred using Numbat with default  
792 parameters (v1.1.0)<sup>22</sup>. Allelic data was collected from plasma cells and B cells and a panel  
793 of 1,200 plasma cells from 11 healthy donors was used as expression reference.  
794

#### 795 Differential Expression Analysis

796 Droplets with < 20,000 reads per cell were discarded, and 20,000 reads per cell were  
797 downsampled across the entire CD138pos scRNA-seq cohort. To control the influence of  
798 individual tumors on the analysis, as well as control for the lower number of non-  
799 progressors in this sub-cohort (n=3, compared to 10 progressors), we randomly sampled  
800 the same number of tumor cells from progressors and non-progressors (~2100 per group)  
801 and balanced the contribution of each individual towards the group (progressors: 210 cells  
802 per patient as one progressor patient had fewer than 210 cells (n=72) after downsampling;  
803 non-progressors: 700 cells per patient). We repeated this process leaving out the one  
804 progressor patient with low number of cells this time considering only 9 progressor  
805 patients and 3 non-progressors and once again balancing the contribution of each  
806 individual towards the group (progressors n=225, non-progressors n=675 per patient). No  
807 difference in results was observed.  
808

#### 809 Statistical Analysis

810 The primary outcome was progression-free survival after two years of study treatment.  
811 Progression-free was defined as being followed for at least two years from the start of  
812 protocol therapy and no confirmed disease progression. The primary endpoint was  
813 calculated for both progression to SLIM-CRB criteria as well as biochemical progression.  
814

815 For this manuscript, progressive disease was defined as per the IMWG uniform  
816 response criteria for MM with either SLIM-CRAB progression or a rise of 25% in serum  
817 or urine M protein or difference between involved and uninvolved FLC levels<sup>51</sup>.  
818

819 Patients who did not have at least 2 years of follow-up or progressed between the start  
820 of treatment and two years after EOT were counted as failed progression-free at 2 years.  
821 The study was designed for a 50 vs 70% progression-free rate with 5% and 10% type I  
822 and type II errors, respectively. The critical value to reject the null hypothesis of 50% was  
823 33 or more of 53 patients and was evaluated using a one-sided exact binomial test.  
824

825 We report the primary outcome and responses to study treatment as proportions with  
826 90% exact binomial confidence intervals. Continuous measures are summarized by  
827 median and range, and categorical variables are summarized as proportions.

828 Categorical variables were tested for association with continuous and other categorical  
829 variables using Wilcoxon rank-sum (or Kruskal-Wallis for three or more groups) or  
830 Fisher's exact tests, respectively. Time-to-event endpoints are estimated using the  
831 method of Kaplan and Meier with 95% confidence intervals calculated using  
832 Greenwood's method to estimate variance. Median follow-up is calculated using the  
833 reverse Kaplan-Meier method. Statistical analyses were performed using R version  
834 4.1.2 (2021-11-01).

835  
836  
837  
838  
839  
840  
841  
842  
843  
844  
845  
846  
847  
848  
849  
850  
851  
852  
853  
854  
855  
856  
857  
858  
859  
860  
861  
862  
863  
864  
865  
866  
867  
868  
869  
870  
871  
872  
873  
874  
875  
876  
877  
878  
879  
880

## **Acknowledgments**

The authors would like to thank the patients and their families for participating in this study.  
Anna V. Justis, PhD, a medical writer employed by Dana-Farber Cancer Institute, edited this manuscript under the direction of the authors.

## **Authorship Contributions**

O.N.: Writing-Original Draft, Writing-Review & Editing  
M.P.A.: Writing-Original Draft, Investigation, Formal analysis, Visualization, Writing-Review & Editing  
R.A.R.: Formal analysis, Visualization, Writing-Review & Editing  
M.T: Formal analysis, Visualization, Writing-Review & Editing  
S.M.: Writing-Review & Editing  
J.A. Writing-Review & Editing, Supervision  
L.B.: Investigation, Writing-Review & Editing  
A.D. Writing-Review & Editing, Supervision  
H.E.: Investigation, Writing-Review & Editing  
M.B.: Investigation, Writing-Review & Editing  
E.D.L.: Investigation, Writing-Review & Editing  
J.P.L.: Writing-Review & Editing  
G.B.: Writing-Review & Editing  
E.O.: Writing-Review & Editing  
T.W.: Writing-Review & Editing  
J.T.: Writing-Review & Editing  
K.A.: Writing-Review & Editing  
P.G.R.: Writing-Review & Editing  
G.G.: Writing-Review & Editing  
L.T.: Writing-Review & Editing, Supervision  
R.S.P.: Writing-Review & Editing, Supervision  
I.M.G.: Conceptualization, Resources, Writing-Review & Editing, Supervision, Funding Acquisition

## **Declaration of Interests**

ON: Research support from Takeda and Janssen; Advisory board participation: Bristol Myers Squibb, Janssen, Sanofi, Takeda, GPCR therapeutics. Honorarium: Pfizer  
M.P.A: No conflicts of interest exist.  
R.A.R.: No conflicts of interest exist.  
M.T: No conflicts of interest exist.  
S.M.: No conflicts of interest exist.  
J.B.A. No conflicts of interest exist.

881 L.B.: No conflicts of interest exist.  
882 A.K.D. No conflicts of interest exist.  
883 H.E.: No conflicts of interest exist.  
884 M.B.: Consultancy with Janssen, BMS, Takeda, Epizyme, Karyopharm, Menarini  
885 Biosystems, and Adaptive.  
886 E.D.L.: No conflicts of interest exist.  
887 J.P.L.: No conflicts of interest exist.  
888 G.B.: Consultancy: Prothena  
889 E.O.: Advisory Board/Honoraria: Janssen, BMS, Sanofi, Pfizer, Exact Consulting—  
890 Takeda Steering Committee: Natera  
891 T.W.: No conflicts of interest exist.  
892 J.T.: No conflicts of interest exist.  
893 K.A.: Consultant: AstraZeneca, Janssen, Pfizer, Board/ Stock Options: Dynamic Cell  
894 Therapies, C4 Therapeutics, Next RNA, Oncopep, Starton, Window  
895 G.G.: No conflicts of interest exist.  
896 L.T.: No conflicts of interest exist.  
897 P.G.R.: Advisory Boards/Consulting: Celgene/BMS, GSK, Karyopharm, Oncopeptides,  
898 Regeneron, Sanofi, Takeda. Research Grants: Oncopeptides, Karyopharm  
899 R.S.P.: Co-founder, equity holder, and consultant on pre-seed stage startup.  
900 I.M.G.: Consulting/Advisory role: AbbVie, Adaptive, Amgen, Aptitude Health, Bristol  
901 Myers Squibb, GlaxoSmithKline, Huron Consulting, Janssen, Menarini Silicon  
902 Biosystems, Oncopeptides, Pfizer, Sanofi, Sognef, Takeda, The Binding Site, and  
903 Window Therapeutics; Speaker fees: Vor Biopharma, Veeva Systems, Inc.; I.M.G.'s  
904 spouse is CMO and an equity holder of Disc Medicine.  
905

### 906 **Inclusion and Ethics**

907 One or more of the authors of this paper self-identifies as an underrepresented ethnic  
908 and/or gender minority in science. One or more of the authors of this paper self-identifies  
909 as a member of the LGBTQIA+ community. We support inclusive, diverse and equitable  
910 conduct of research.  
911

### 912 **Data availability**

913 Single-cell RNA and TCR-sequencing raw data generated for this study will be deposited  
914 in dbGaP (study site pending). Gene expression matrices can be accessed on Mendeley:  
915 [https://data.mendeley.com/preview/z56k3y8cdg?a=6945f72a-b190-4fb1-b0fe-](https://data.mendeley.com/preview/z56k3y8cdg?a=6945f72a-b190-4fb1-b0fe-31c12a70a0d4)  
916 [31c12a70a0d4](https://data.mendeley.com/preview/z56k3y8cdg?a=6945f72a-b190-4fb1-b0fe-31c12a70a0d4) (reserved DOI:10.17632/z56k3y8cdg.1)  
917  
918

### 919 **Code Availability**

920 This paper does not report original code.  
921

922 **Figure Legends**

923

924 **Figure 1. A)** Consort Diagram **B)** Primary events such as translocations and  
925 hyperdiploidy and secondary events such as copy number alterations identified by  
926 FISH, WGS, and scRNA-seq along with response to therapy. WGS = Whole genome  
927 sequencing, scRNA = Single-cell RNA sequencing. scRNA-seq revealed a more complex  
928 aberration in one case (HRD with trisomies of chromosomes 5, 9, 11, 15, 19, and 21) compared  
929 to whole-genome sequencing (WGS) which only detected trisomies on chromosomes 9 and 15.  
930 This explains the apparent discrepancy between WGS finding "no primary event" and scRNA-  
931 seq identifying HRD (homologous recombination deficiency) in that case. ND=Not determined,  
932 CR=Complete response, VGPR=Very good partial response, PR=Partial response, MR=Minimal  
933 response, SD=Stable disease.

934

935 **Figure 2. Swimmer's plot of responses deepening over time.** Each lane represents  
936 one participant.

937

938 **Figure 3. Progression-free and overall survival.** Progression defined by **A)**  
939 Biochemical progression or **B)** SLiM CRAB criteria **C)** Overall survival. NR = not  
940 reached **D)** Kaplan-Meier curve of response duration stratified by 20/2/20 risk groups.  
941 **E)** Kaplan-Meier curve of progression stratified by 20/2/20 risk groups. Survival  
942 distributions were compared using one-sided log-rank tests.

943

944 **Figure 4. Outcomes stratified by the presence of evolving subtype prior to**  
945 **treatment. A)** Overall survival **B)** progression-free survival **C)** time-to-progression and  
946 **D)** duration of response. NR = not reached. Survival distributions were compared using  
947 one-sided log-rank tests.

948

949 **Figure 5. Kaplan Meier Curve of Progression-Free Survival** based on **A)** Depth of  
950 Response of VGPR of greater. VGPR = Very good partial response **B)** depth of  
951 response amongst cytogenetically high-risk patients by High-risk patients identified by  
952 FISH alone. **C)** by High-risk patients identified by FISH, WGS, or single-cell RNA  
953 sequencing. **D)** Kaplan-Meier curve of duration of response stratified by patients who  
954 achieved sustained CR. **E)** Kaplan-Meier curve of progression-free-survival stratified by  
955 patients who achieved sustained CR. CR = Complete response. Survival distributions  
956 were compared using one-sided log-rank tests.

957

958 **Figure 6. Kaplan Meier Curve of Outcomes Based on MRD Status: A).** Overall  
959 Survival, **B)** Progression-free survival. Survival distributions were compared using one-  
960 sided log-rank tests.

961

962 **Figure 7. Single-cell RNA sequencing of bone marrow CD138+ cells. A)** Time to  
963 progression or last follow-up for the subcohort of patients with sequencing data (one  
964 patient per row). The type of sequencing data available for individual patients is  
965 indicated by green boxes. Patients are grouped by progression status. **B)** Uniform  
966 manifold approximation and projection (UMAP) embeddings of patients' and HD's  
967 plasma cells that passed quality filtering Cells are colored by the patient from which

968 they originate or patients or HD as a group **C)** UMAP colored by malignancy status  
969 (tumor vs normal cells). **D)** UMAP colored by biochemical progression status. **E)**  
970 Volcano plot of differential gene expression in progressors and non-progressors. Two-  
971 sided p values were computed with Wilcoxon's rank-sum test and corrected using the  
972 Benjamini-Hochberg approach. The top 30 genes on either side of the volcano with  $q <$   
973 0.05 are indicated by stars. **F)** HLA class I expression in patients from the PADIMAC  
974 cohort who responded (bortezomib\_good) or did not respond (Bortezomib\_standard) to  
975 bortezomib treatment. Single-cell RNA sequencing of T cells from CD138- samples. **G)**  
976 UMAP of T cells **H)** Bar plot visualizing the proportion of clonotypes belonging to each of  
977 four clone size categories per patient in BM CD138- samples drawn at BL. For patient's  
978 T cell subtype being analyzed, 100 cells were randomly sampled 100 times from non-  
979 progressor and progressor patients, and the proportion of expanded (1-rare) clonotypes  
980 was compared between the two using bootstrapping with 1000 iterations. The average  
981 proportion per clone size category is visualized, and the SD across iterations is depicted  
982 in solid-line error bars. **I)** Boxplots, violin plots, and scatterplots comparing the  
983 abundance of GZMB+ CD8+ T effector memory (TEM) cells in expanded clones  
984 between non-progressors and progressors. Two-sided p values were computed with  
985 Wilcoxon's rank-sum test and corrected using the Benjamini-Hochberg approach. **J)**  
986 UMAP embedding of progressor and non-progressor patients' BM T cells at BL with  
987 matched TCR data. T cells with expanded clones (with a frequency  $> 1\%$ ) are colored  
988 by cell type. Cells with rare clonotypes are shown in grey. **K)** Volcano plot of differential  
989 gene expression of clonally expanded CD8 TEM in progressors and non-progressors. p  
990 values were computed with Wilcoxon's rank-sum test and corrected using the  
991 Benjamini-Hochberg approach. Top 30 genes on either side of the volcano with  $q < 0.05$   
992 are indicated by stars. HD = healthy donors; P = patient; WGS = whole-genome  
993 sequencing; HRD = hyperdiploidy  
994  
995



996 **References**

997  
998 1. Kyle RA, Remstein ED, Therneau TM, et al: Clinical course and prognosis of  
999 smoldering (asymptomatic) multiple myeloma. *N Engl J Med* 356:2582-90, 2007  
1000 2. Dispenzieri A, Kyle RA, Katzmann JA, et al: Immunoglobulin free light chain  
1001 ratio is an independent risk factor for progression of smoldering (asymptomatic) multiple  
1002 myeloma. *Blood* 111:785-9, 2008  
1003 3. Perez-Persona E, Vidriales MB, Mateo G, et al: New criteria to identify risk of  
1004 progression in monoclonal gammopathy of uncertain significance and smoldering multiple  
1005 myeloma based on multiparameter flow cytometry analysis of bone marrow plasma cells. *Blood*  
1006 110:2586-92, 2007  
1007 4. Rajkumar SV, Landgren O, Mateos MV: Smoldering multiple myeloma. *Blood*  
1008 125:3069-75, 2015  
1009 5. Lakshman A, Rajkumar SV, Buadi FK, et al: Risk stratification of smoldering  
1010 multiple myeloma incorporating revised IMWG diagnostic criteria. *Blood Cancer J* 8:59, 2018  
1011 6. Cowan A, Ferrari F, Freeman SS, et al: Personalised progression prediction in  
1012 patients with monoclonal gammopathy of undetermined significance or smoldering multiple  
1013 myeloma (PANGEA): a retrospective, multicohort study. *The Lancet Haematology* 10:e203-  
1014 e212, 2023  
1015 7. Hill E, Dew A, Morrison C, et al: Assessment of Discordance Among Smoldering  
1016 Multiple Myeloma Risk Models. *JAMA Oncology* 7:132-134, 2021  
1017 8. Bustoros M, Sklavenitis-Pistofidis R, Park J, et al: Genomic Profiling of  
1018 Smoldering Multiple Myeloma Identifies Patients at a High Risk of Disease Progression. *J Clin*  
1019 *Oncol* 38:2380-2389, 2020  
1020 9. Bolli N, Maura F, Minvielle S, et al: Genomic patterns of progression in  
1021 smoldering multiple myeloma. *Nat Commun* 9:3363, 2018  
1022 10. Misund K, Keane N, Stein CK, et al: MYC dysregulation in the progression of  
1023 multiple myeloma. *Leukemia* 34:322-326, 2020  
1024 11. Oben B, Froyen G, Maclachlan KH, et al: Whole-genome sequencing reveals  
1025 progressive versus stable myeloma precursor conditions as two distinct entities. *Nat Commun*  
1026 12:1861, 2021  
1027 12. Boyle EM, Deshpande S, Tytarenko R, et al: The molecular make up of  
1028 smoldering myeloma highlights the evolutionary pathways leading to multiple myeloma. *Nat*  
1029 *Commun* 12:293, 2021  
1030 13. Mateos MV, Hernandez MT, Giraldo P, et al: Lenalidomide plus dexamethasone  
1031 for high-risk smoldering multiple myeloma. *N Engl J Med* 369:438-47, 2013  
1032 14. Lonial S, Jacobus S, Fonseca R, et al: Randomized Trial of Lenalidomide Versus  
1033 Observation in Smoldering Multiple Myeloma. *J Clin Oncol* 38:1126-1137, 2020  
1034 15. Goodman AM, Kim MS, Prasad V: Persistent challenges with treating multiple  
1035 myeloma early. *Blood* 137:456-458, 2021  
1036 16. Avet-Loiseau H, Bahlis NJ: Smoldering Multiple Myeloma : Taking the narrow  
1037 over the wide path? *Blood*, 2024  
1038 17. Ghobrial IM, Gormley N, Kumar SK, et al: Round Table Discussion on Optimal  
1039 Clinical Trial Design in Precursor Multiple Myeloma. *Blood Cancer Discovery:OF1-OF7*, 2024  
1040 18. Mateos MV LJ, Rodrigues-Otero P, et al. : Curative Strategy (GEM-CESAR) for  
1041 High-Risk Smoldering Myeloma (SMM): Carfilzomib, Lenalidomide and Dexamethasone (KRd)

1042 As Induction Followed By HDT-ASCT, Consolidation with Krd and Maintenance with Rd.  
1043 Blood 134:781, 2019

1044 19. Kazandjian D, Hill E, Dew A, et al: Carfilzomib, Lenalidomide, and  
1045 Dexamethasone Followed by Lenalidomide Maintenance for Prevention of Symptomatic  
1046 Multiple Myeloma in Patients With High-risk Smoldering Myeloma: A Phase 2 Nonrandomized  
1047 Controlled Trial. JAMA Oncol 7:1678-1685, 2021

1048 20. Sklavenitis-Pistofidis R, Aranha MP, Redd RA, et al: Immune biomarkers of  
1049 response to immunotherapy in patients with high-risk smoldering myeloma. Cancer Cell  
1050 40:1358-1373.e8, 2022

1051 21. Kumar SK, Alsina M, Laplant B, et al: Fixed Duration Therapy with  
1052 Daratumumab, Carfilzomib, Lenalidomide and Dexamethasone for High Risk Smoldering  
1053 Multiple Myeloma-Results of the Ascent Trial. Blood 140:1830-1832, 2022

1054 22. Gao T, Soldatov R, Sarkar H, et al: Haplotype-aware analysis of somatic copy  
1055 number variations from single-cell transcriptomes. Nat Biotechnol 41:417-426, 2023

1056 23. Durie BG, Harousseau JL, Miguel JS, et al: International uniform response  
1057 criteria for multiple myeloma. Leukemia 20:1467-73, 2006

1058 24. Rajkumar SV, Dimopoulos MA, Palumbo A, et al: International Myeloma  
1059 Working Group updated criteria for the diagnosis of multiple myeloma. Lancet Oncol 15:e538-  
1060 48, 2014

1061 25. Rajkumar SV: Updated Diagnostic Criteria and Staging System for Multiple  
1062 Myeloma. Am Soc Clin Oncol Educ Book 35:e418-23, 2016

1063 26. Lonial S, Jacobus SJ, Weiss M, et al: E3A06: Randomized phase III trial of  
1064 lenalidomide versus observation alone in patients with asymptomatic high-risk smoldering  
1065 multiple myeloma. Journal of Clinical Oncology 37:8001-8001, 2019

1066 27. Munshi NC, Avet-Loiseau H, Anderson KC, et al: A large meta-analysis  
1067 establishes the role of MRD negativity in long-term survival outcomes in patients with multiple  
1068 myeloma. Blood Advances 4:5988-5999, 2020

1069 28. Daniele P, Mamolo C, Cappelleri JC, et al: Response rates and minimal residual  
1070 disease outcomes as potential surrogates for progression-free survival in newly diagnosed  
1071 multiple myeloma. PLoS One 17:e0267979, 2022

1072 29. Gulla A, Morelli E, Samur MK, et al: Bortezomib Induces Anti-Multiple  
1073 Myeloma Immune Response Mediated by cGAS/STING Pathway Activation. Blood Cancer  
1074 Discovery 2:468-483, 2021

1075 30. Schnell S, Démollière C, van den Berk P, et al: Gimap4 accelerates T-cell death.  
1076 Blood 108:591-599, 2006

1077 31. Tang J, Jia X, Li J, et al: Themis suppresses the effector function of CD8+ T cells  
1078 in acute viral infection. Cellular & Molecular Immunology 20:512-524, 2023

1079 32. Facon T, Venner CP, Bahlis NJ, et al: Oral ixazomib, lenalidomide, and  
1080 dexamethasone for transplant-ineligible patients with newly diagnosed multiple myeloma. Blood  
1081 137:3616-3628, 2021

1082 33. Moreau P, Masszi T, Grzasko N, et al: Oral Ixazomib, Lenalidomide, and  
1083 Dexamethasone for Multiple Myeloma. New England Journal of Medicine 374:1621-1634, 2016

1084 34. Ghobrial IM, Gormley N, Kumar SK, et al: Round Table Discussion on Optimal  
1085 Clinical Trial Design in Precursor Multiple Myeloma. Blood Cancer Discovery:OF1-OF7, 2024

1086 35. Puig N, Contreras MT, Agulló C, et al: Mass spectrometry vs immunofixation for  
1087 treatment monitoring in multiple myeloma. Blood Adv 6:3234-3239, 2022

1088           36.    Wu V, Moshier E, Leng S, et al: Risk stratification of smoldering multiple  
1089 myeloma: predictive value of free light chains and group-based trajectory modeling. *Blood Adv*  
1090 2:1470-1479, 2018

1091           37.    Perrot A, Lauwers-Cances V, Corre J, et al: Minimal residual disease negativity  
1092 using deep sequencing is a major prognostic factor in multiple myeloma. *Blood* 132:2456-2464,  
1093 2018

1094           38.    El-Khoury H, Lee DJ, Alberge JB, et al: Prevalence of monoclonal gammopathies  
1095 and clinical outcomes in a high-risk US population screened by mass spectrometry: a multicentre  
1096 cohort study. *Lancet Haematol*, 2022

1097           39.    Sakrikar D, Marrot N, North S, et al: Multi-Site Verification of the Automated  
1098 EXENT(R) MALDI-TOF-MS System and Immunoglobulin Isotypes Assay for the Identification  
1099 and Quantification of Monoclonal Immunoglobulins, 2021 AACC Annual Scientific Meeting,  
1100 2021

1101           40.    Landis JR, Koch GG: The measurement of observer agreement for categorical  
1102 data. *Biometrics* 33:159-74, 1977

1103           41.    Dutta AK, Alberge JB, Lightbody ED, et al: MinimuMM-seq: Genome  
1104 Sequencing of Circulating Tumor Cells for Minimally Invasive Molecular Characterization of  
1105 Multiple Myeloma Pathology. *Cancer Discov* 13:348-363, 2023

1106           42.    Li H: Aligning sequence reads, clone sequences and assembly contigs with BWA-  
1107 MEM. *arXiv preprint arXiv:1303.3997*, 2013

1108           43.    Kim S, Scheffler K, Halpern AL, et al: Strelka2: fast and accurate calling of  
1109 germline and somatic variants. *Nat Methods* 15:591-594, 2018

1110           44.    Carter SL, Cibulskis K, Helman E, et al: Absolute quantification of somatic DNA  
1111 alterations in human cancer. *Nat Biotechnol* 30:413-21, 2012

1112           45.    Morton LM, Karyadi DM, Stewart C, et al: Radiation-related genomic profile of  
1113 papillary thyroid carcinoma after the Chernobyl accident. *Science* 372, 2021

1114           46.    Zheng GX, Terry JM, Belgrader P, et al: Massively parallel digital transcriptional  
1115 profiling of single cells. *Nat Commun* 8:14049, 2017

1116           47.    Wolock SL, Lopez R, Klein AM: Scrublet: Computational Identification of Cell  
1117 Doublets in Single-Cell Transcriptomic Data. *Cell Syst* 8:281-291.e9, 2019

1118           48.    Bais AS, Kostka D: scds: computational annotation of doublets in single-cell  
1119 RNA sequencing data. *Bioinformatics* 36:1150-1158, 2020

1120           49.    Germain PL, Lun A, Garcia Meixide C, et al: Doublet identification in single-cell  
1121 sequencing data using scDblFinder. *F1000Res* 10:979, 2021

1122           50.    Zheng GXY, Terry JM, Belgrader P, et al: Massively parallel digital  
1123 transcriptional profiling of single cells. *Nature Communications* 8:14049, 2017

1124           51.    Kumar S, Paiva B, Anderson KC, et al: International Myeloma Working Group  
1125 consensus criteria for response and minimal residual disease assessment in multiple myeloma.  
1126 *Lancet Oncol* 17:e328-e346, 2016

1127

**Figure 1**

**A**

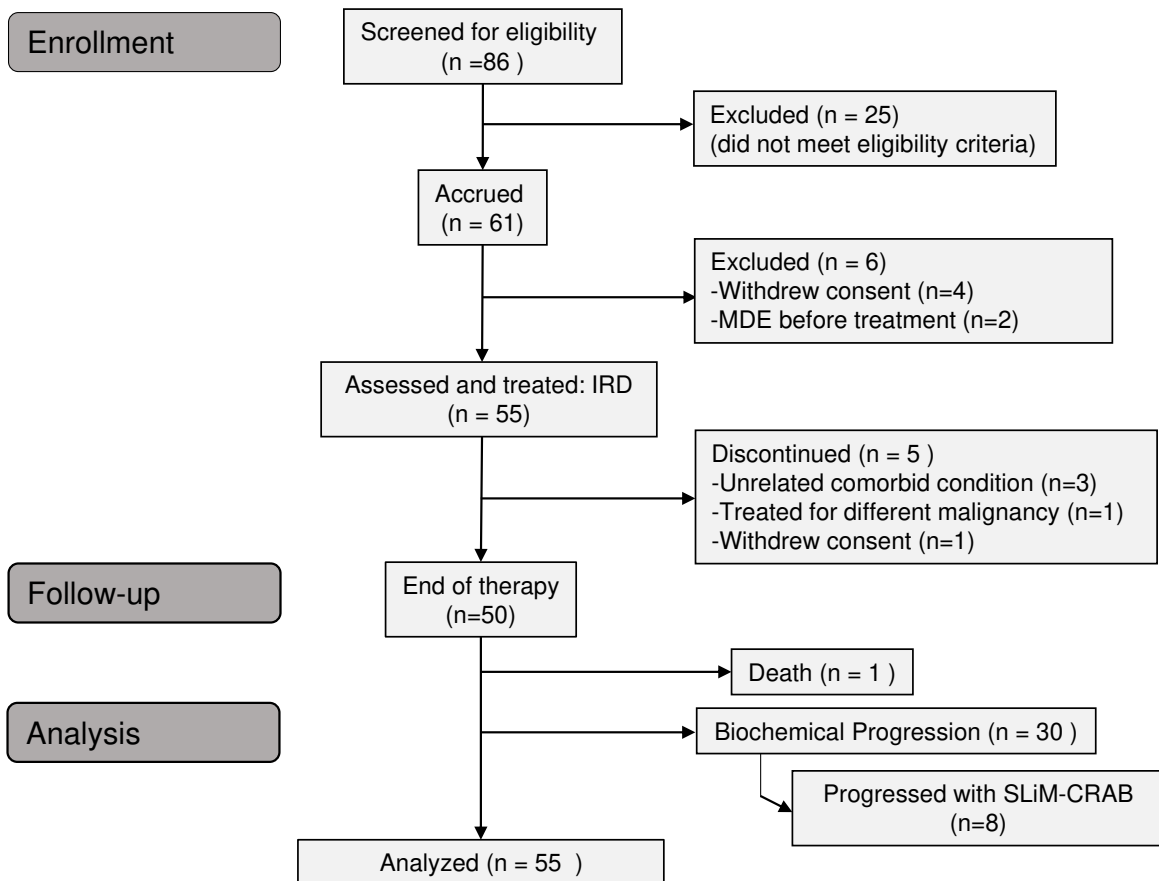

**B**

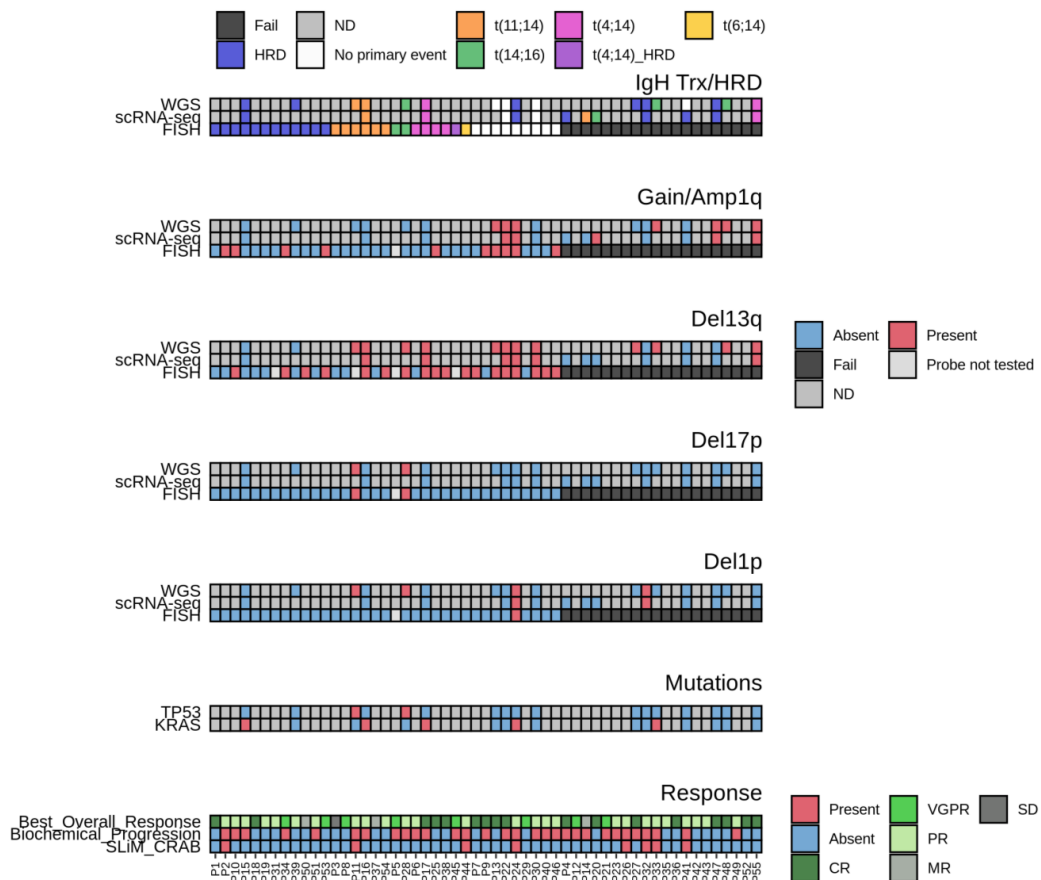

**Figure 2**

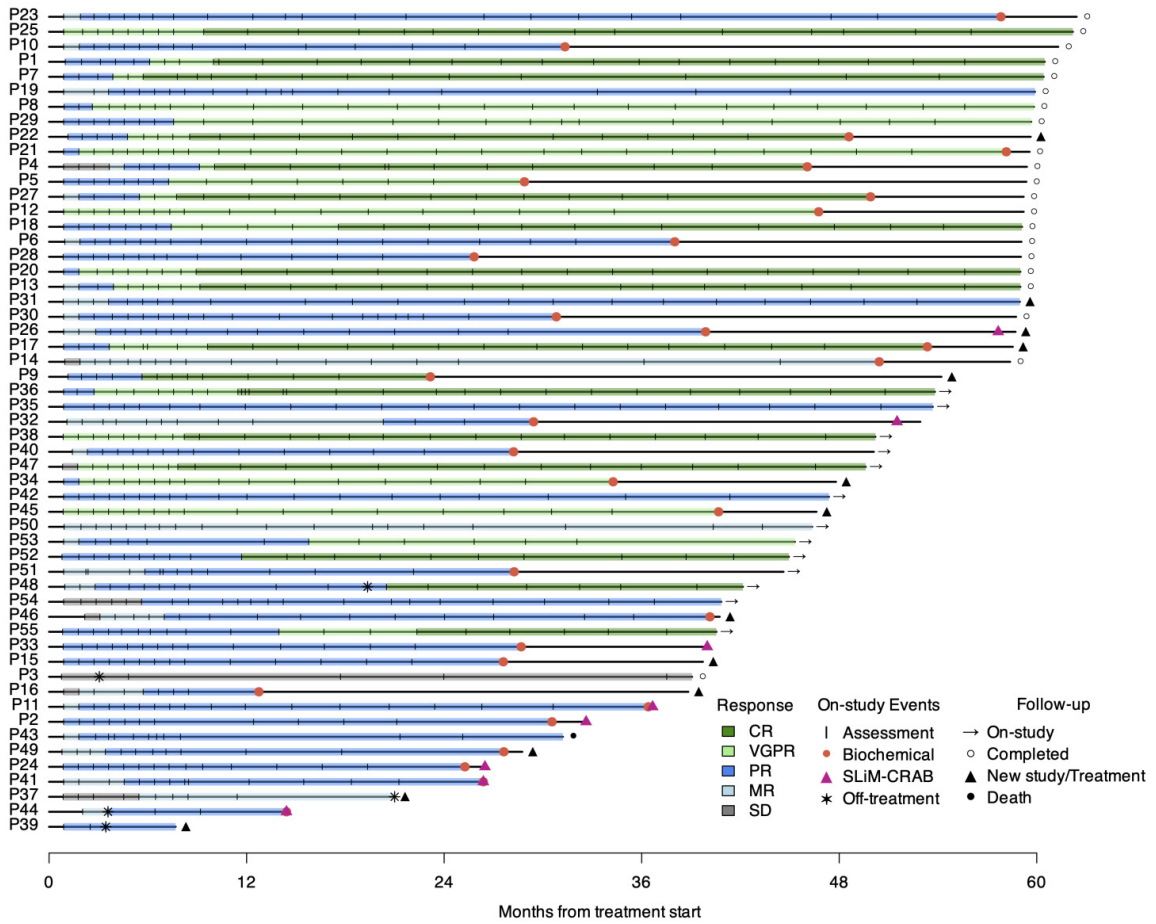

**Figure 3**

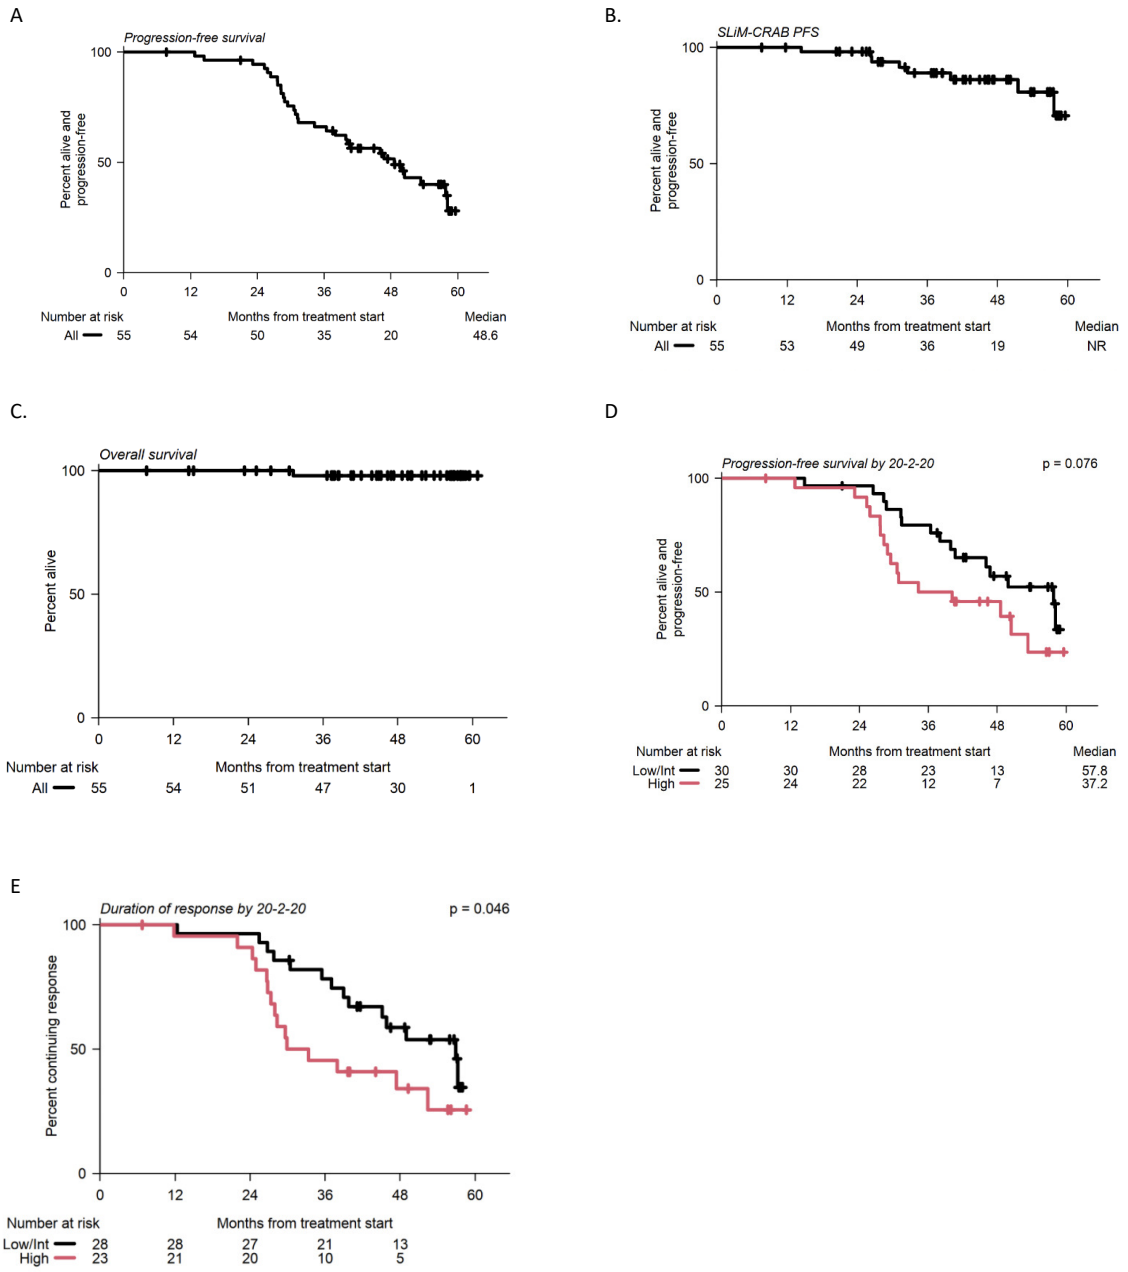

**Figure 4**

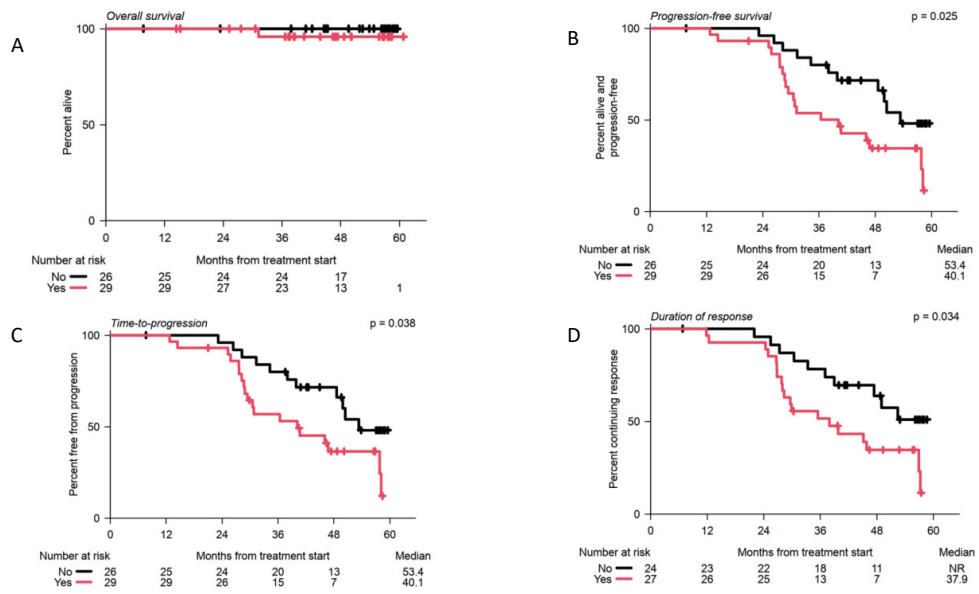

**Figure 5**

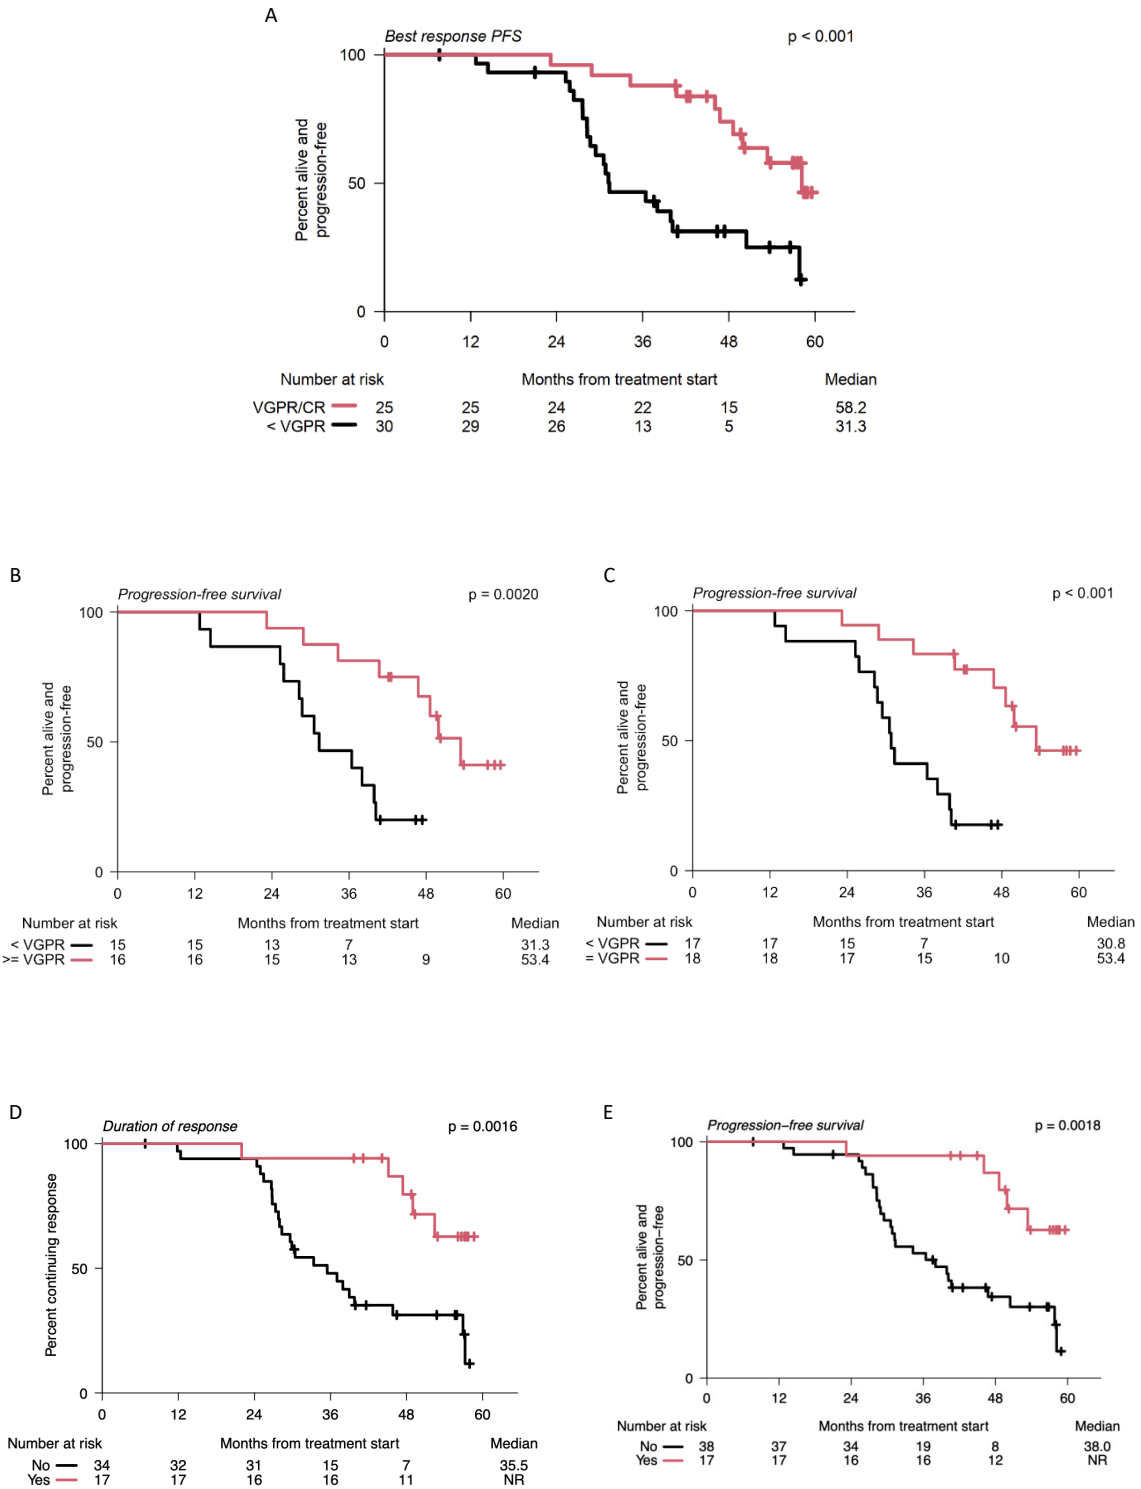



**Figure 6**

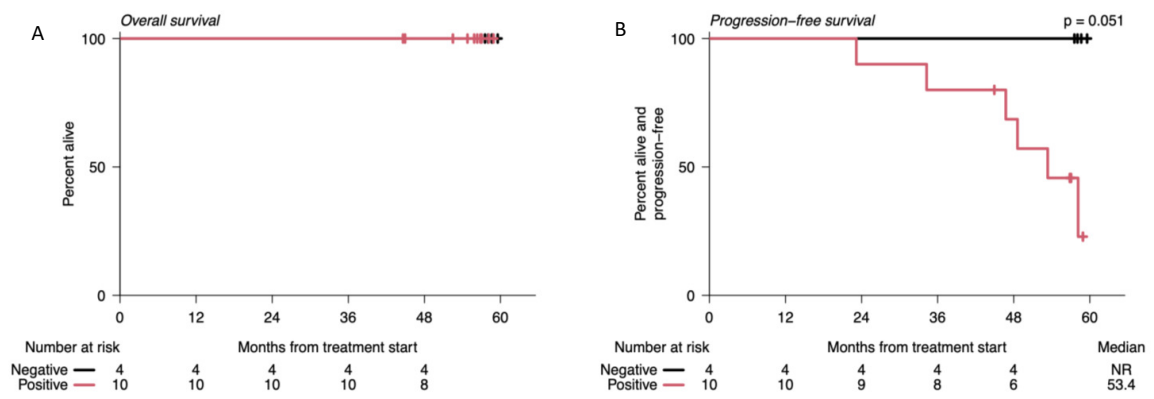

**Figure 7**

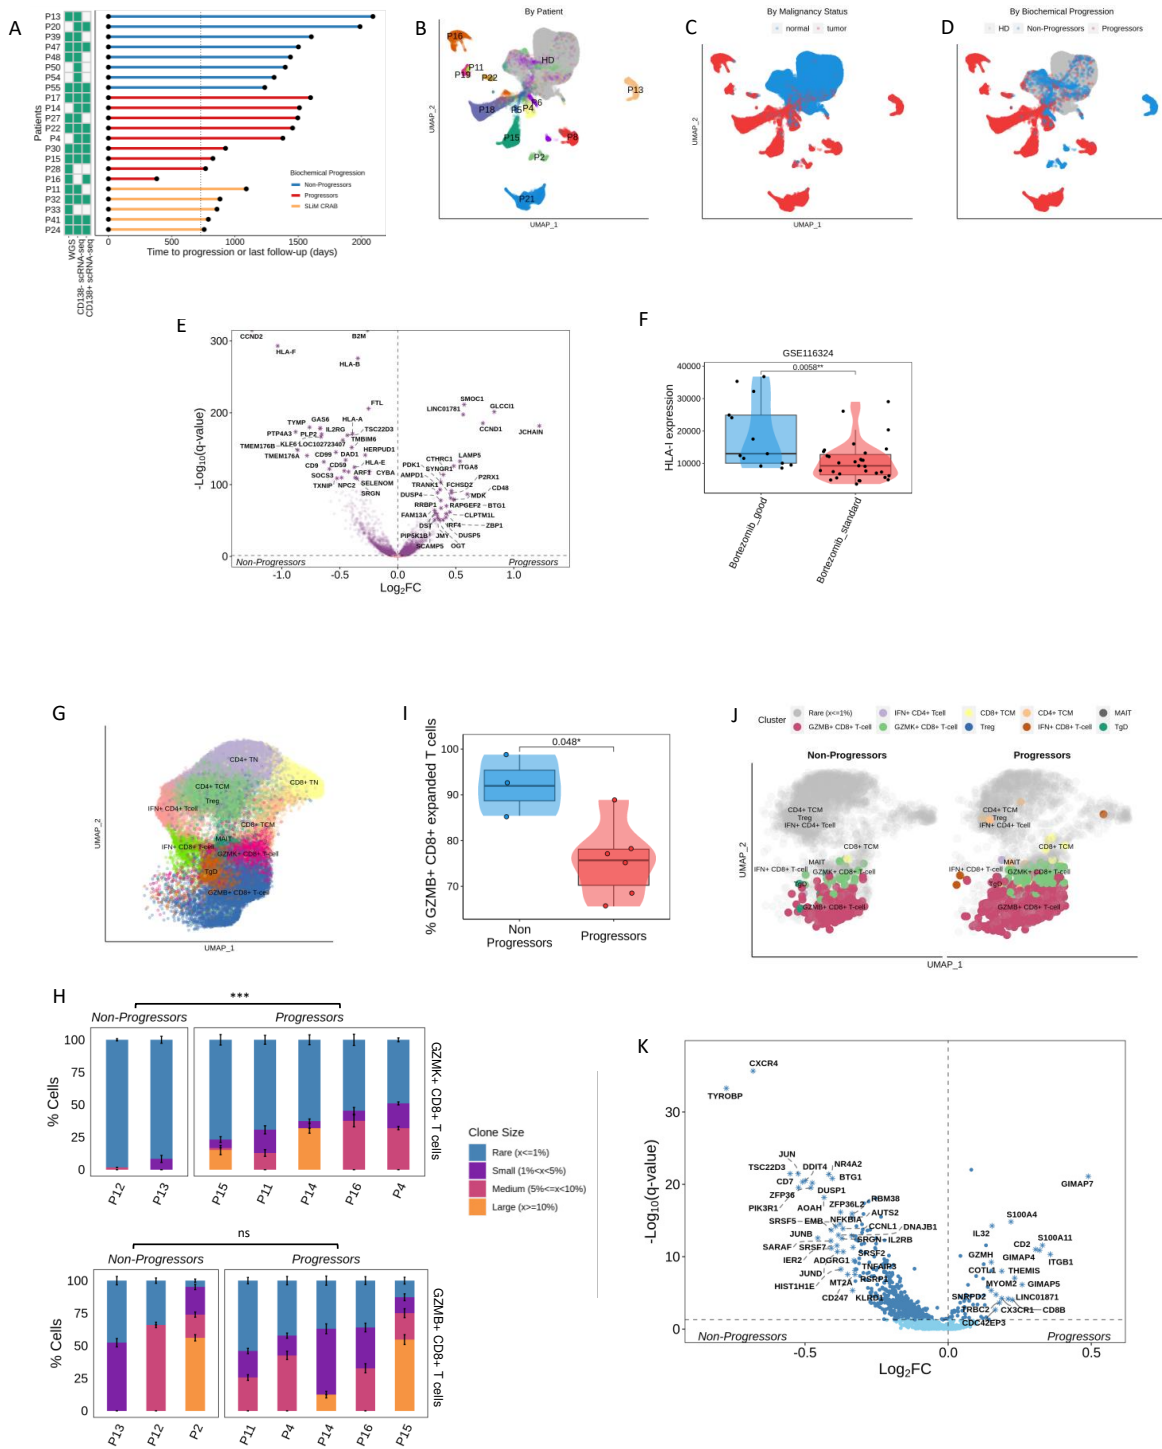

Table 1A. Baseline Characteristics

|                                                                 | <b>(N = 55)</b> |
|-----------------------------------------------------------------|-----------------|
| <b>Median age – yr (range)</b>                                  | 64 (40-84)      |
| <b>Male sex – no. (%)</b>                                       | 30 (55%)        |
| <b>Race – no. / N (%)</b>                                       |                 |
| White/Caucasian                                                 | 53 (96%)        |
| Asian                                                           | 1 (2%)          |
| Other                                                           | 1 (2%)          |
| <b>Ethnicity – no. / N (%)</b>                                  |                 |
| Hispanic                                                        | 2 (4%)          |
| Non-Hispanic                                                    | 53 (96%)        |
| <b>ECOG performance status – no. / N (%)</b>                    |                 |
| 0                                                               | 46 (84%)        |
| 1                                                               | 9 (16%)         |
| <b>Smoldering myeloma disease type – no. / N%</b>               |                 |
| IgG                                                             | 37 (67%)        |
| IgA                                                             | 16 (29%)        |
| Light chain only                                                | 2 (4%)          |
| <b>Evolving Disease– no. / N (%)</b>                            |                 |
| Yes                                                             | 29 (53%)        |
| No                                                              | 26 (47%)        |
| <b>Cytogenetic risk category – no. / N (%)</b>                  |                 |
| High-risk [t(4;14), t(14;16), del(17p), 1q gain, del1p, del13q] | 35 (64%)        |
| Standard-risk                                                   | 14 (25%)        |
| Not determined                                                  | 6 (11%)         |
| <b>†Cytogenetic abnormalities - no. / N (%)</b>                 |                 |
| t(4;14)                                                         | 6 (11%)         |
| t(14;16)                                                        | 6 (11%)         |
| del(17p)                                                        | 3 (5%)          |
| 1q gain/amp                                                     | 18 (33%)        |
| t(11;14)                                                        | 8 (15%)         |
| Monosomy 13                                                     | 26 (47%)        |
| <b>20/20 Risk</b>                                               |                 |
| High                                                            | 25 (45%)        |
| Intermediate                                                    | 21 (38%)        |
| Low                                                             | 9 (16%)         |
| <b>Mayo 2008</b>                                                |                 |
| 1 risk factor                                                   | 13 (24%)        |
| 2 risk factors                                                  | 40 (72%)        |
| 3 risk factors                                                  | 2 (4%)          |

† Cytogenetic abnormalities are compiled from FISH, scRNA-seq and WGS at screening or pre-screening timepoint. For one patient, a primary event translocation was taken from a post-screening timepoint. Cytogenetic data was unknown for 6 patients.

Table 1B. Baseline Risk Stratification

| Patient ID | IgA Isotype <sup>a</sup> | M-spike $\geq 3.0^b$ | Immuno paresis <sup>c</sup> | FLC Ratio $\geq 8^d$ | Evolving Disease <sup>e</sup> | BMPC 50-60% <sup>f</sup> | t(4;14)-17p+1q <sup>g</sup> | High-Risk cytogenetics FISH <sup>h</sup> | High-Risk cytogenetics FISH+Seq <sup>i</sup> | Mayo 2008 | IMWG 20/2/20 | IMWG High Precision | Number of High-Risk Criteria † | Total number of eligibility criteria met (+BMPC $\geq 10\%$ ) †† |
|------------|--------------------------|----------------------|-----------------------------|----------------------|-------------------------------|--------------------------|-----------------------------|------------------------------------------|----------------------------------------------|-----------|--------------|---------------------|--------------------------------|------------------------------------------------------------------|
| P1         | 1                        | 0                    | 0                           | 1                    | 1                             | 0                        | 0                           | 0                                        | 0                                            | Int       | Int          | Low-Int             | 1                              | 3                                                                |
| P2         | 0                        | 1                    | 1                           | 1                    | 1                             | 1                        | 1                           | 1                                        | 1                                            | High      | High         | High                | 5                              | 6                                                                |
| P3         | 1                        | 0                    | 1                           | 0                    | 0                             | 0                        | 0                           | 0                                        | 0                                            | Low       | Int          | Low                 | 0                              | 2                                                                |
| P4         | 0                        | 0                    | 1                           | 1                    | 1                             | 0                        | N/A                         | N/A                                      | 0                                            | Int       | Low          | Low                 | 1                              | 3                                                                |
| P5         | 0                        | 0                    | 0                           | 1                    | 1                             | 0                        | 0                           | 1                                        | 1                                            | Int       | High         | High                | 4                              | 2                                                                |
| P6         | 1                        | 0                    | 0                           | 0                    | 0                             | 0                        | 1                           | 1                                        | 1                                            | Low       | Low          | Low                 | 1                              | 2                                                                |
| P7         | 1                        | 0                    | 1                           | 0                    | 0                             | 0                        | 0                           | 1                                        | 1                                            | Low       | Int          | Low-Int             | 1                              | 2                                                                |
| P8         | 1                        | 0                    | 1                           | 0                    | 0                             | 0                        | 0                           | 0                                        | 0                                            | Low       | Low          | Low                 | 0                              | 2                                                                |
| P9         | 0                        | 0                    | 1                           | 1                    | 0                             | 0                        | 0                           | 0                                        | 1                                            | Int       | High         | Low-Int             | 2                              | 2                                                                |
| P10        | 0                        | 0                    | 1                           | 1                    | 0                             | 1                        | 1                           | 1                                        | 1                                            | Int       | Int          | High                | 2                              | 4                                                                |
| P11        | 0                        | 0                    | 1                           | 1                    | 1                             | 0                        | 1                           | 1                                        | 1                                            | Int       | Int          | Int                 | 2                              | 4                                                                |
| P12        | 1                        | 0                    | 0                           | 0                    | 1                             | 0                        | 1                           | 1                                        | 1                                            | Low       | Low          | Low                 | 2                              | 3                                                                |
| P13        | 0                        | 0                    | 1                           | 1                    | 0                             | 0                        | 1                           | 1                                        | 1                                            | Int       | Low          | Int                 | 1                              | 3                                                                |
| P14        | 0                        | 0                    | 1                           | 0                    | 0                             | 0                        | N/A                         | N/A                                      | N/A                                          | Low       | High         | Low-Int             | 1                              | 1                                                                |
| P15        | 0                        | 1                    | 0                           | 0                    | 1                             | 1                        | 0                           | 0                                        | 0                                            | Int       | High         | Int                 | 2                              | 3                                                                |
| P16        | 0                        | 0                    | 0                           | 1                    | 1                             | 0                        | 0                           | 1                                        | 1                                            | Int       | High         | Int                 | 3                              | 2                                                                |
| P17        | 0                        | 1                    | 0                           | 1                    | 0                             | 1                        | 1                           | 1                                        | 1                                            | High      | High         | High                | 4                              | 4                                                                |
| P18        | 0                        | 0                    | 1                           | 1                    | 0                             | 0                        | 0                           | 0                                        | 0                                            | Int       | High         | High                | 2                              | 2                                                                |
| P19        | 1                        | 0                    | 1                           | 1                    | 0                             | 0                        | 0                           | 0                                        | 0                                            | Int       | Int          | Int                 | 0                              | 3                                                                |
| P20        | 0                        | 0                    | 0                           | 1                    | 0                             | 0                        | N/A                         | N/A                                      | 1                                            | Int       | Int          | Low-Int             | 1                              | 1                                                                |
| P21        | 1                        | 0                    | 0                           | 0                    | 1                             | 0                        | N/A                         | N/A                                      | N/A                                          | Low       | Low          | Low                 | 1                              | 2                                                                |
| P22        | 0                        | 0                    | 0                           | 1                    | 0                             | 0                        | 1                           | 1                                        | 1                                            | Int       | High         | High                | 3                              | 2                                                                |
| P23        | 0                        | 0                    | 0                           | 1                    | 1                             | 0                        | N/A                         | N/A                                      | N/A                                          | Int       | Low          | Low                 | 1                              | 2                                                                |
| P24        | 0                        | 0                    | 1                           | 1                    | 1                             | 1                        | 1                           | 1                                        | 1                                            | Int       | High         | High                | 4                              | 5                                                                |
| P25        | 1                        | 0                    | 1                           | 1                    | 0                             | 1                        | 1                           | 1                                        | 1                                            | Int       | High         | Int                 | 2                              | 5                                                                |
| P26        | 0                        | 0                    | 0                           | 0                    | 0                             | 0                        | 1                           | 1                                        | 1                                            | Low       | Low          | Low-Int             | 1                              | 1                                                                |
| P27        | 0                        | 0                    | 0                           | 1                    | 0                             | 0                        | 0                           | 1                                        | 1                                            | Int       | Int          | Low-Int             | 1                              | 1                                                                |
| P28        | 0                        | 0                    | 1                           | 0                    | 1                             | 0                        | 1                           | 1                                        | 1                                            | Low       | High         | Int                 | 3                              | 3                                                                |
| P29        | 0                        | 0                    | 0                           | 1                    | 1                             | 0                        | 0                           | 0                                        | 0                                            | Int       | Int          | Low-Int             | 1                              | 2                                                                |
| P30        | 1                        | 0                    | 1                           | 1                    | 1                             | 1                        | 0                           | 1                                        | 1                                            | Int       | High         | Int                 | 3                              | 5                                                                |
| P31        | 0                        | 0                    | 1                           | 1                    | 1                             | 0                        | 0                           | 0                                        | 0                                            | Int       | High         | Low-Int             | 2                              | 3                                                                |
| P32        | 0                        | 0                    | 1                           | 1                    | 1                             | 1                        | 0                           | 0                                        | 1                                            | Int       | High         | High                | 4                              | 4                                                                |
| P33        | 0                        | 0                    | 1                           | 1                    | 1                             | 1                        | 1                           | 1                                        | 1                                            | Int       | Int          | Low-Int             | 2                              | 5                                                                |
| P34        | 0                        | 0                    | 0                           | 1                    | 0                             | 0                        | 1                           | 1                                        | 1                                            | Int       | High         | Int                 | 2                              | 2                                                                |
| P35        | 0                        | 0                    | 0                           | 1                    | 1                             | 0                        | N/A                         | N/A                                      | N/A                                          | Int       | Int          | Low-Int             | 1                              | 2                                                                |
| P36        | 0                        | 0                    | 1                           | 1                    | 0                             | 0                        | 1                           | 1                                        | 1                                            | Int       | Int          | Int                 | 1                              | 3                                                                |
| P37        | 1                        | 0                    | 1                           | 1                    | 1                             | 0                        | 0                           | 0                                        | 0                                            | Int       | Int          | Int                 | 1                              | 4                                                                |
| P38        | 0                        | 0                    | 1                           | 1                    | 1                             | 0                        | 1                           | 1                                        | 1                                            | Int       | High         | High                | 4                              | 4                                                                |
| P39        | 0                        | 0                    | 1                           | 0                    | 0                             | 0                        | 0                           | 0                                        | 0                                            | Low       | High         | Low-Int             | 1                              | 1                                                                |
| P40        | 0                        | 0                    | 1                           | 1                    | 1                             | 0                        | 0                           | 1                                        | 1                                            | Int       | Low          | Low-Int             | 2                              | 3                                                                |
| P41        | 0                        | 0                    | 0                           | 1                    | 0                             | 0                        | N/A                         | N/A                                      | 0                                            | Int       | Int          | Low-Int             | 0                              | 1                                                                |
| P42        | 1                        | 0                    | 1                           | 1                    | 1                             | 0                        | 0                           | 1                                        | 1                                            | Int       | Int          | Low-Int             | 2                              | 4                                                                |
| P43        | 0                        | 0                    | 0                           | 1                    | 1                             | 0                        | N/A                         | N/A                                      | N/A                                          | Int       | Int          | Low-Int             | 1                              | 2                                                                |
| P44        | 0                        | 0                    | 1                           | 1                    | 1                             | 0                        | 0                           | 1                                        | 1                                            | Int       | Int          | Int                 | 2                              | 3                                                                |
| P45        | 1                        | 0                    | 1                           | 1                    | 1                             | 0                        | 1                           | 1                                        | 1                                            | Int       | Int          | Low-Int             | 2                              | 5                                                                |
| P46        | 1                        | 0                    | 1                           | 1                    | 1                             | 0                        | 1                           | 1                                        | 1                                            | Int       | High         | Int                 | 3                              | 5                                                                |
| P47        | 1                        | 0                    | 0                           | 0                    | 0                             | 0                        | 1                           | 1                                        | 1                                            | Low       | Int          | Low                 | 1                              | 2                                                                |
| P48        | 0                        | 0                    | 1                           | 0                    | 0                             | 0                        | 0                           | 1                                        | 1                                            | Low       | Int          | Low-Int             | 1                              | 1                                                                |
| P49        | 0                        | 0                    | 1                           | 1                    | 1                             | 0                        | N/A                         | N/A                                      | N/A                                          | Int       | High         | Low-Int             | 2                              | 3                                                                |
| P50        | 0                        | 0                    | 0                           | 1                    | 1                             | 0                        | 0                           | 1                                        | 1                                            | Int       | High         | Int                 | 3                              | 2                                                                |
| P51        | 0                        | 0                    | 1                           | 0                    | 0                             | 0                        | 0                           | 0                                        | 0                                            | Low       | High         | Low-Int             | 1                              | 1                                                                |
| P52        | 1                        | 0                    | 1                           | 1                    | 0                             | 0                        | N/A                         | N/A                                      | N/A                                          | Int       | High         | Int                 | 1                              | 3                                                                |
| P53        | 1                        | 0                    | 0                           | 1                    | 0                             | 0                        | 1                           | 1                                        | 1                                            | Int       | Int          | Low-Int             | 1                              | 3                                                                |
| P54        | 1                        | 0                    | 0                           | 1                    | 0                             | 0                        | 0                           | 1                                        | 1                                            | Int       | High         | Low-Int             | 2                              | 2                                                                |
| P55        | 0                        | 0                    | 0                           | 1                    | 1                             | 0                        | N/A                         | N/A                                      | 1                                            | Int       | High         | High                | 4                              | 2                                                                |

Abbreviations: FLC, Free Light Chain; BMPC, Bone Marrow Plasma Cells; FISH, Fluorescent In-Situ Hybridization; Seq, Sequencing; Int, Intermediate. Columns <sup>a-g</sup> contain high-risk criteria as defined by Rajkumar et al<sup>4</sup>. High-Risk cytogenetics in columns <sup>h,i</sup> defined as t(4;14), t(14;16), 1q gain/amp, 13q deletion/monosomy 13, dedeletion 1p, and 17p deletion.

† Total Number of High-Risk Criteria by Mayo 2008, IMWG 20/2/20, IMWG High Precision, Evolving Disease, and High-Risk Cytogenetics by FISH+Seq

†† Total Eligibility criteria met for enrollment as described in Methods section.

Table 2. Summary of Adverse Reactions Reported During Treatment

| Event – no. (%)                                             | (N = 55)   |          |          |          |
|-------------------------------------------------------------|------------|----------|----------|----------|
|                                                             | All grades | Grade 2* | Grade 3* | Grade 4* |
| <b>Any event</b>                                            | 55 (100)   | 20 (36)  | 34 (62)  | 5 (9)    |
| <b>Blood and lymphatic system disorders</b>                 |            |          |          |          |
| Neutropenia                                                 | 43 (78)    | 18 (33)  | 14 (25)  | 2 (4)    |
| Thrombocytopenia                                            | 33 (60)    | 4 (7)    | 4 (7)    | 1 (2)    |
| Leukopenia                                                  | 44 (80)    | 21 (38)  | 10 (18)  |          |
| Anemia                                                      | 33 (60)    | 6 (11)   | 1 (2)    |          |
| Lymphopenia                                                 | 15 (27)    | 4 (7)    | 6 (11)   | 2 (4)    |
| <b>Gastrointestinal disorders</b>                           |            |          |          |          |
| Diarrhea                                                    | 27 (67)    | 5 (9)    |          |          |
| Constipation                                                | 26 (47)    | 1 (2)    |          |          |
| Nausea                                                      | 33 (60)    | 3 (5)    |          |          |
| <b>General disorders and administration site conditions</b> |            |          |          |          |
| Fatigue                                                     | 42 (76)    | 11 (20)  | 1 (2)    |          |
| Insomnia                                                    | 31 (56)    | 3 (5)    |          |          |
| <b>Infections and infestations</b>                          |            |          |          |          |
| Upper Respiratory Infection                                 | 18 (33)    | 15 (27)  | 2 (4)    |          |
| <b>Investigations</b>                                       |            |          |          |          |
| Alanine aminotransferase increased                          | 14 (25)    |          |          |          |
| <b>Metabolism and nutrition disorders</b>                   |            |          |          |          |
| Hypophosphatemia                                            | 16 (29)    | 8 (15)   | 7 (13)   |          |
| Hypomagnesemia                                              | 13 (24)    |          |          |          |
| Hyperglycemia                                               |            |          |          | 1 (2)    |
| Hypokalemia                                                 | 10 (18)    |          | 3 (5)    | 1 (2)    |
| <b>Nervous system disorders</b>                             | 32 (9.0)   |          |          |          |
| Sensory peripheral neuropathy                               | 31 (56)    | 7 (13)   |          |          |
| <b>Skin and subcutaneous tissue disorders</b>               |            |          |          |          |
| Maculo-papular rash                                         | 38 (69)    | 11 (20)  | 5 (9)    |          |
| <b>Vascular disorders</b>                                   |            |          |          |          |
| Peripheral edema                                            | 31 (56)    | 5 (9)    |          |          |

\* If applicable

Table 3. Summary of Responses to Treatment

---

**(N = 55)**

---

| <b>Best response (IMWG) – no. (%)</b> |                  |
|---------------------------------------|------------------|
| PR or better [95% CI]                 | 51 (93) [84–97]  |
| VGPR or better [95% CI]               | 25 (45) [32- 56] |
| CR*                                   | 17 (31)          |
| VGPR                                  | 8 (15)           |
| PR                                    | 26 (47)          |

---

\*All patients with CR achieved stringent CR

---
